# Supplementary material for: Bimetallic Au–Pd nanoparticles supported on silica with a tunable core@shell structure: enhanced catalytic activity of Pd(core)–Au(shell) over Au(core)–Pd(shell)
Source: Royal Society of Chemistry journal article supplement (doi:10.1039/d1na00489a), 2021-01-01
Supplement: d1na00489a1.pdf [file d1na00489a1.pdf]

**Bimetallic Au-Pd nanoparticles supported on silica with tunable core@shell structure:  
Enhanced catalytic activity of Pd(core)-Au(shell) over Au(core)-Pd(shell)**

*Gauravyoti D. Kalita<sup>a</sup>, Podma P. Sarmah<sup>a</sup>, Golap Kalita<sup>b</sup>, Pankaj Das<sup>a\*</sup>*

<sup>a</sup>Department of Chemistry, Dibrugarh University, Dibrugarh, Assam, India, 786004.

<sup>b</sup>Department of Physical Science and Engineering, Nagoya Institute of Technology (NiTech),  
Nagoya, Aichi, Japan-466-8555.

**Supporting Information**

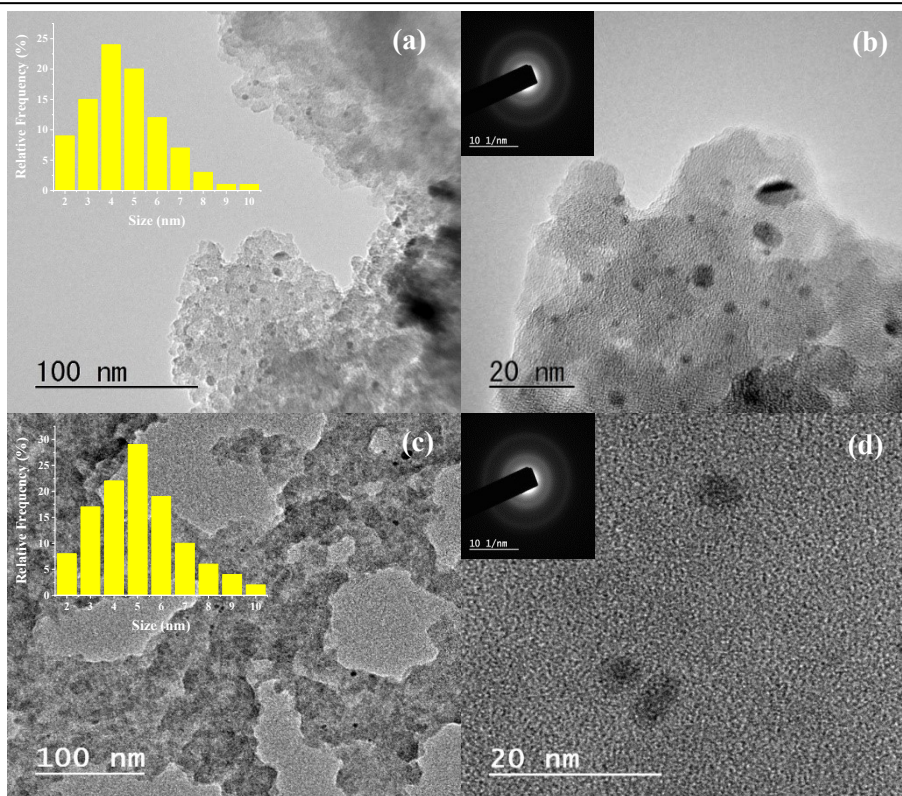

**Fig. S1** (a) TEM image and size-distribution histogram (50 particles per site count) of SiO<sub>2</sub>@Au with corresponding (b) HRTEM image and SAED pattern depicted on inset; (c) TEM image and size-distribution histogram (50 particles per site count) of SiO<sub>2</sub>@Pd with corresponding (d) HRTEM image and SAED pattern depicted on inset

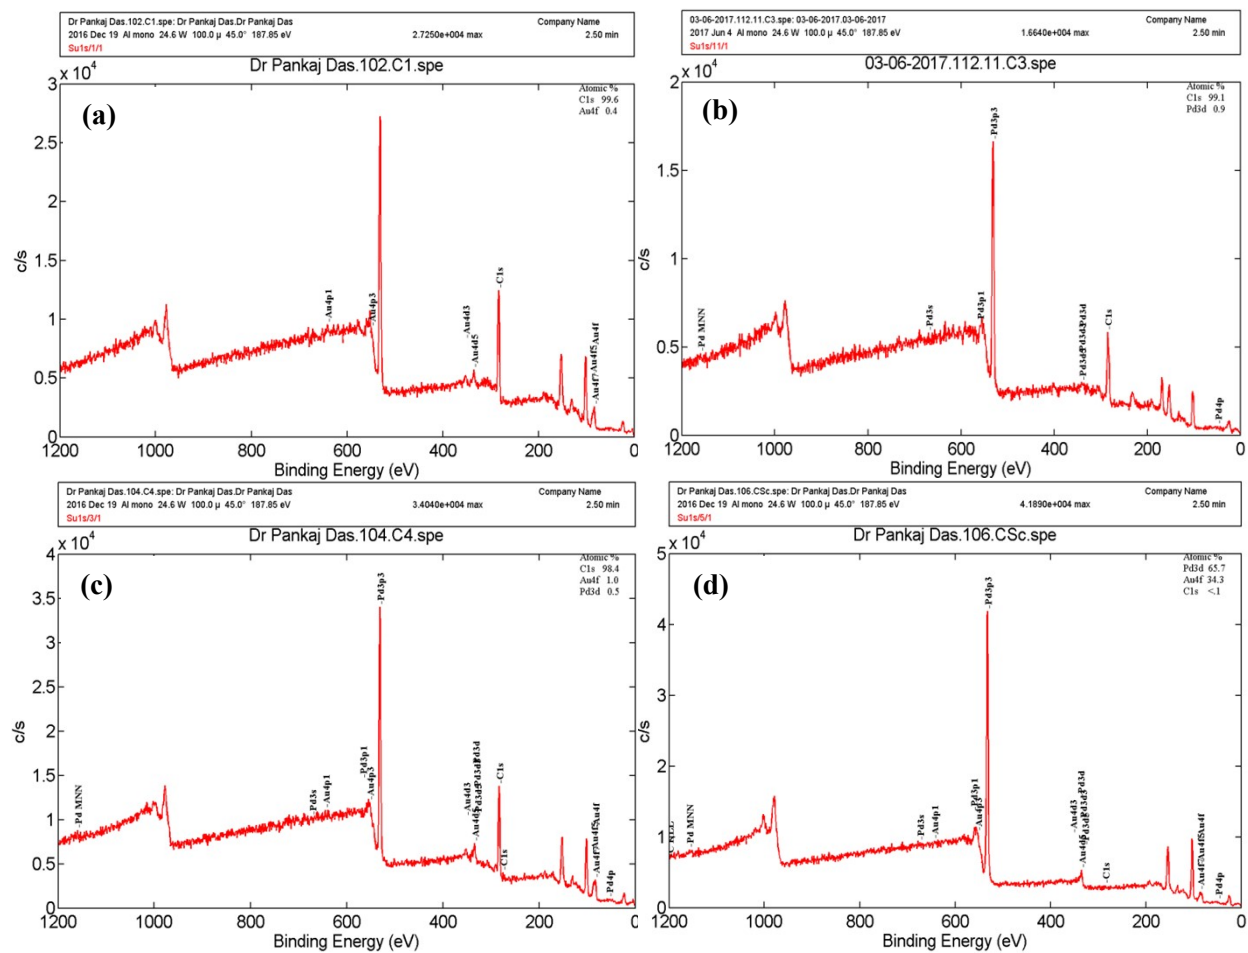

**Fig. S2** XPS survey spectrum of the as prepared (a) SiO<sub>2</sub>@Au, (b) SiO<sub>2</sub>@Pd (c) Pd@Au-SiO<sub>2</sub> and (d) Au@Pd-SiO<sub>2</sub> materials

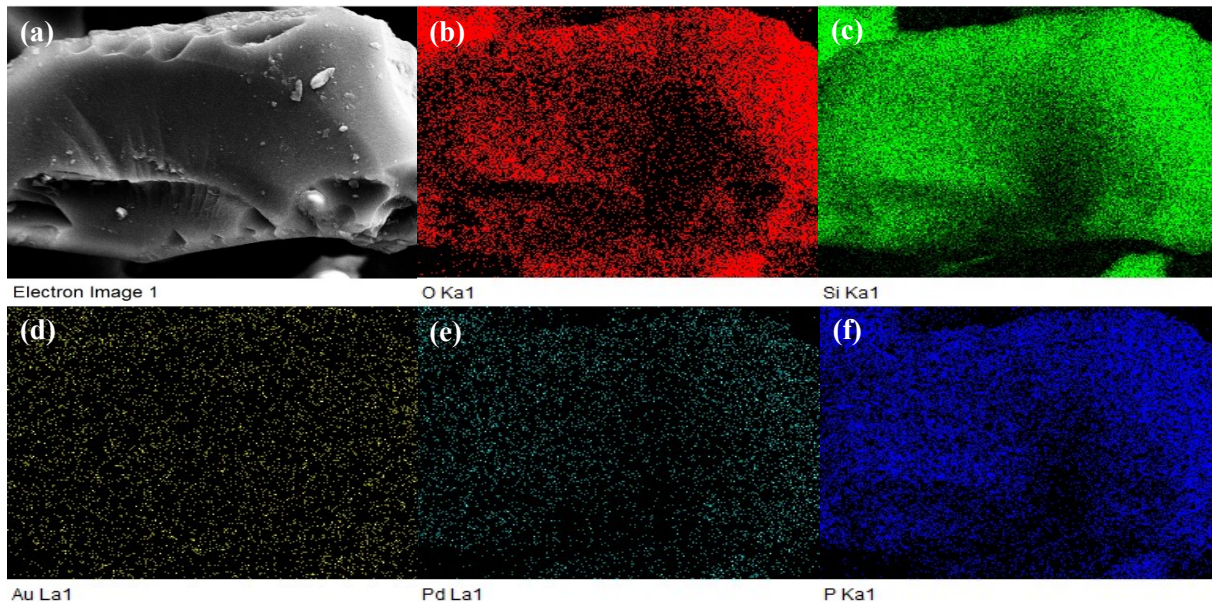

**Fig. S3** FESEM-EDS images (a) electron image with corresponding elemental distributions (b) O Ka 1 (c) Si Ka1 (d) Au La1 (e) Pd La1 (f) P Ka1 of nanoparticle incorporated Pd@Au-SiO<sub>2</sub> material

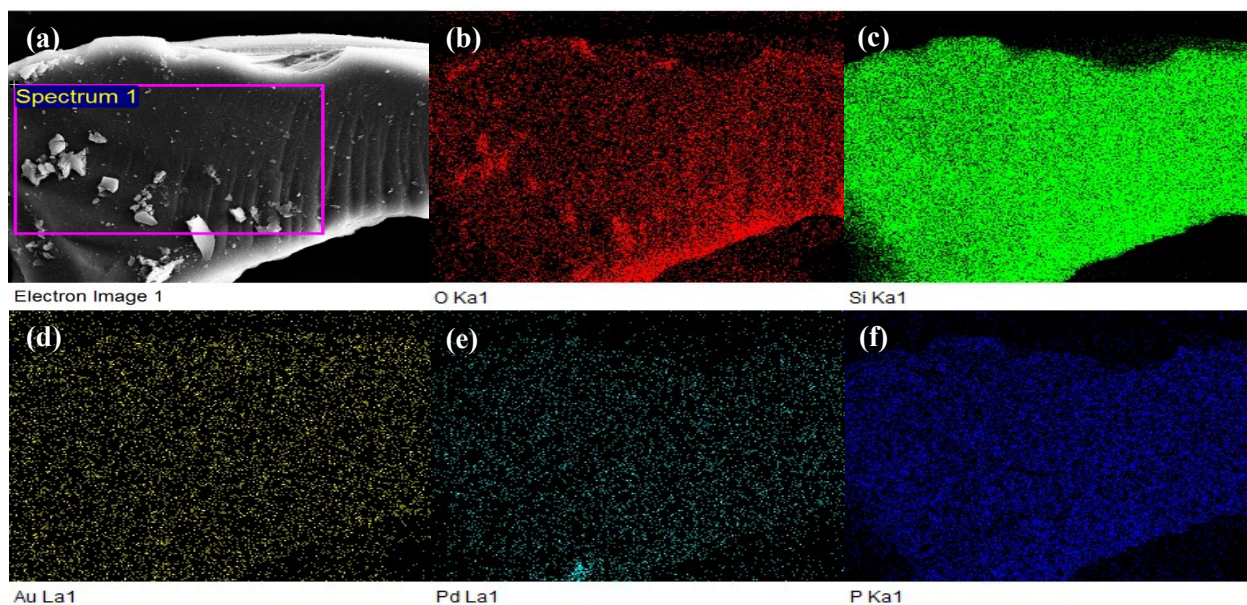

**Fig. S4** FESEM-EDS images (a) electron image with corresponding elemental distributions (b) O Ka 1 (c) Si Ka1 (d) Au La1 (e) Pd La1 (f) P Ka1 of nanoparticle incorporated Au@Pd-SiO<sub>2</sub> material

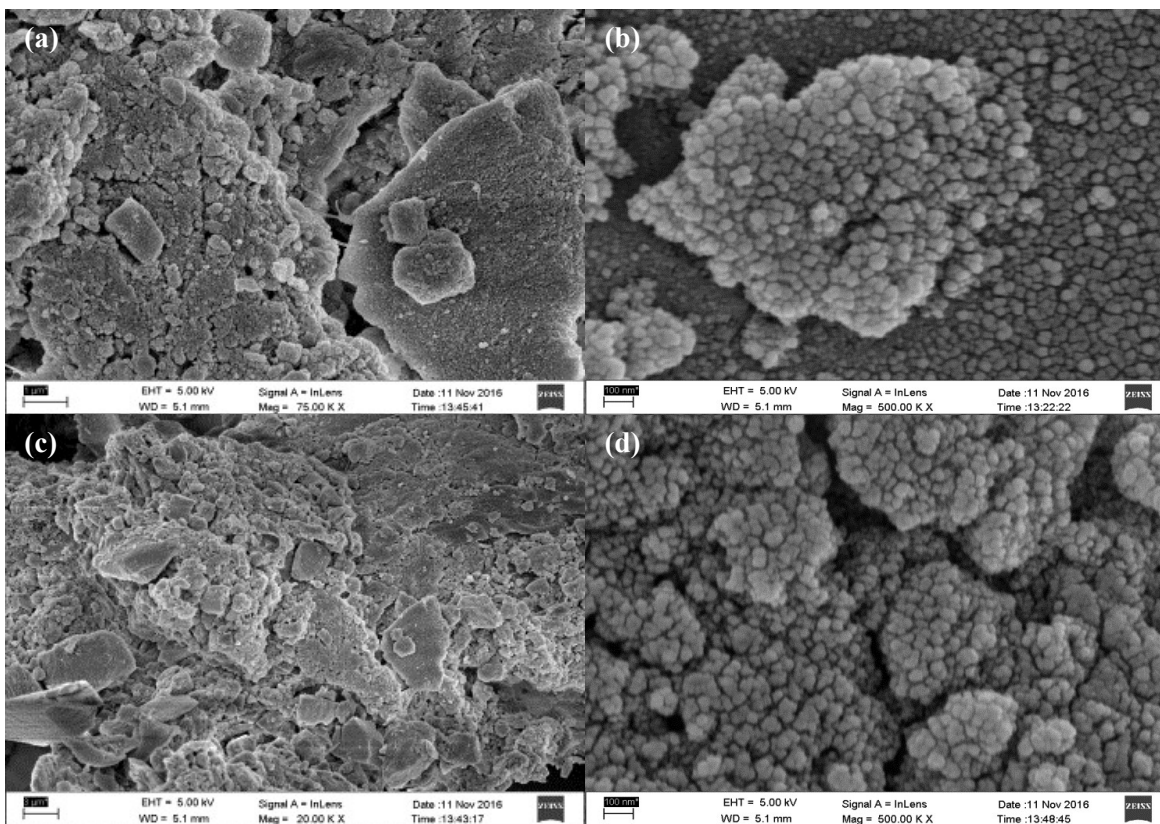

Fig. S5 FESEM images (a) and (b) for Pd@Au-SiO<sub>2</sub>; and (c) and (d) for Au@Pd-SiO<sub>2</sub>

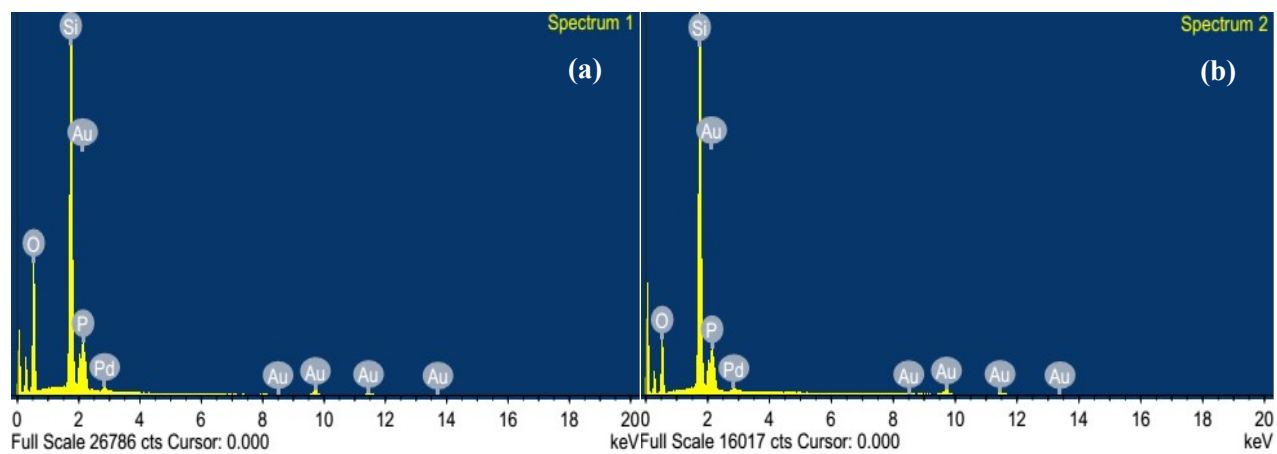

Fig. S6 FESEM-EDX spectra of (a) Pd@Au-SiO<sub>2</sub> and (b) Au@Pd-SiO<sub>2</sub>

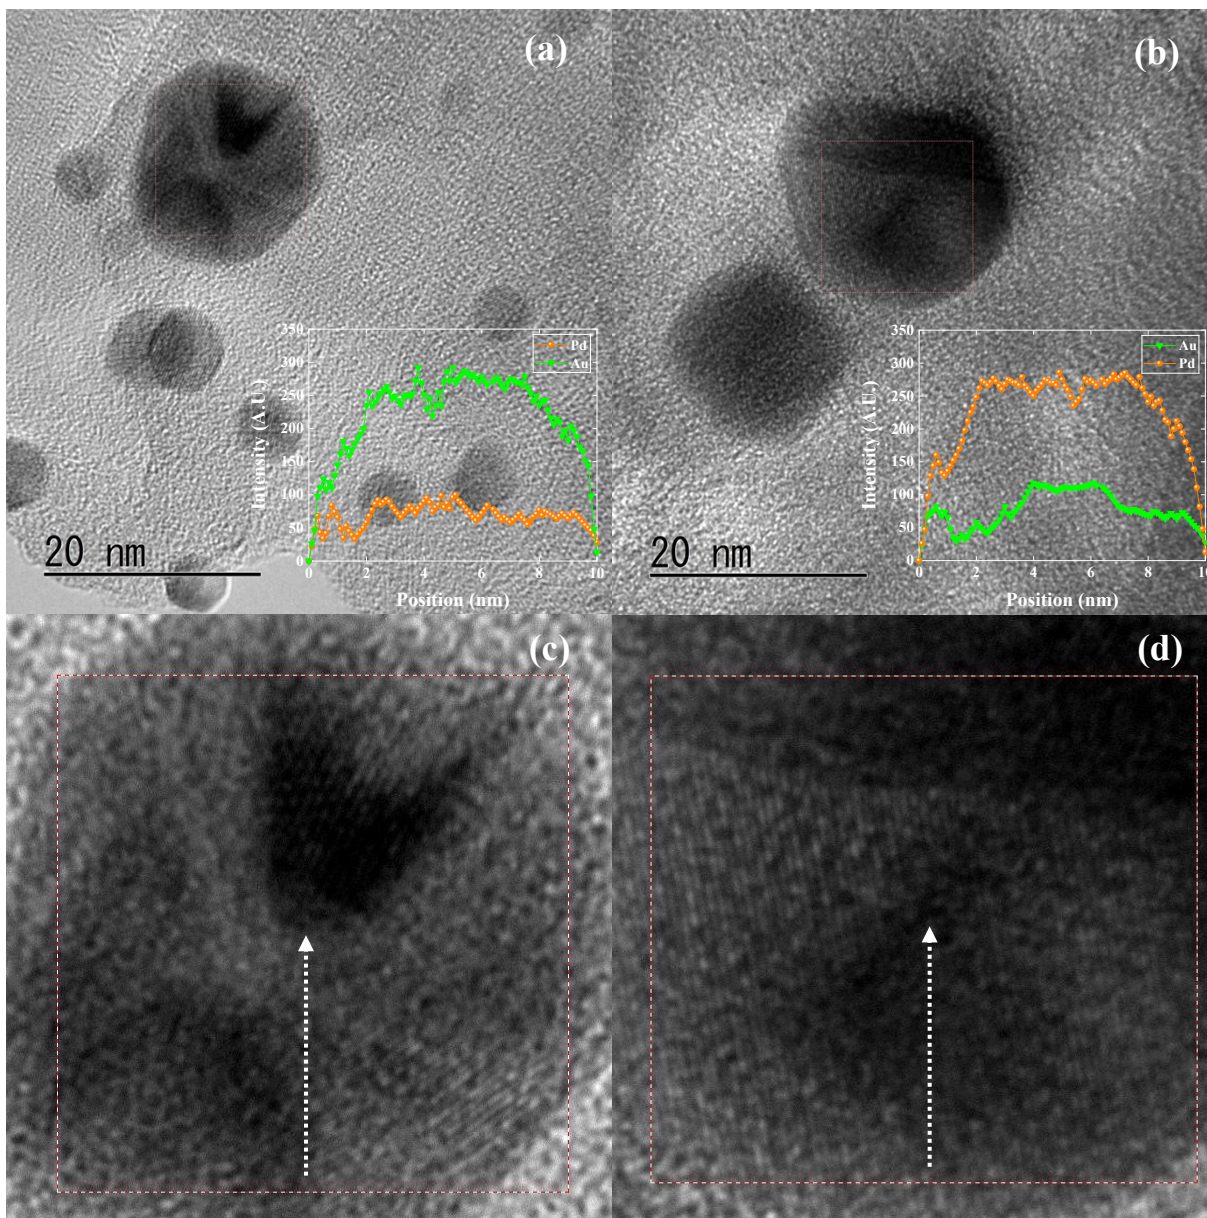

**Fig. S7** TEM micrographs and line scan profiles (inset) for (a) Au@Pd-SiO<sub>2</sub> and (b) Pd@Au-SiO<sub>2</sub> along with the respective scanned cross-sections for (c) Au@Pd-SiO<sub>2</sub> and (d) Pd@Au-SiO<sub>2</sub>

**Table S1** Hydrogenation of 4-CNB with Pd@Au-SiO<sub>2</sub> core-shell nanoparticles as catalysts under liquid phase conditions <sup>a</sup>

| Entry | Solvent        | Reductant                                        | Substrate (mmol) | Time (h) | Conversion [%] <sup>b</sup> | Selectivity [%] <sup>b, c</sup> |
|-------|----------------|--------------------------------------------------|------------------|----------|-----------------------------|---------------------------------|
| 1     | EtOH           | NH <sub>3</sub> , BH <sub>3</sub>                | 2                | 5        | 44                          | 86                              |
| 2     | EtOH           | HCOONH <sub>4</sub>                              | 2                | 1        | 18                          | 99                              |
| 3     | EtOH           | HCOOH                                            | 2                | 1        | 20                          | 99                              |
| 4     | EtOH           | H <sub>2</sub>                                   | 2                | 1        | 4                           | 99                              |
| 5     | EtOH           | N <sub>2</sub> H <sub>4</sub> , H <sub>2</sub> O | 2                | 0.5      | 42                          | 99                              |
| 6     | EtOH           | N <sub>2</sub> H <sub>4</sub> , H <sub>2</sub> O | 2                | 1        | 88                          | 98                              |
| 7     | EtOH           | N <sub>2</sub> H <sub>4</sub> , H <sub>2</sub> O | 2                | 2        | 98                          | 88                              |
| 8     | EtOH           | N <sub>2</sub> H <sub>4</sub> , H <sub>2</sub> O | 4                | 1        | 76                          | 96                              |
| 9     | EtOH           | Ethanol                                          | 2                | 5        | NR                          | -                               |
| 10    | <i>i</i> -PrOH | <i>i</i> -PrOH                                   | 2                | 5        | NR                          | -                               |
| 11    | EtOH           | NaBH <sub>4</sub>                                | 2                | 3        | 35                          | 80                              |
| 12    | EtOH           | Ascorbic acid                                    | 2                | 24       | 2                           | 99                              |

**[a]** Reaction conditions: Pd@Au-SiO<sub>2</sub> [Au (0.13 mol%), Pd (0.15 mol%)], ethanol (5 mL), 400 rpm at 80°C, **[b]** Determined by GC-MS analysis, **[c]** Aniline (AN) was formed as the sole by-product **[d]** H<sub>2</sub> gas pressure was maintained at 1 bar.

**Table S2** Comparison of catalytic efficiency of Pd@Au-SiO<sub>2</sub> with different solvents for hydration of benzonitrile <sup>a</sup>

| Entry          | Solvent (ratio)                        | Time (h) | Conversion (%) <sup>c</sup> | Selectivity (%) <sup>c</sup> |
|----------------|----------------------------------------|----------|-----------------------------|------------------------------|
| 1              | H <sub>2</sub> O (Neat)                | 24       | -                           | 99                           |
| 2              | EtOH: H <sub>2</sub> O (1:1)           | 10       | 64                          | 99                           |
| 3              | EtOH: H <sub>2</sub> O (1:10)          | 10       | Trace                       | 99                           |
| 4              | DMSO                                   | 8        | 62                          | 99                           |
| 5              | MeOH: H <sub>2</sub> O (1:1)           | 5        | 89                          | 99                           |
| 6              | MeOH: H <sub>2</sub> O (1:10)          | 12       | 60                          | 99                           |
| 7              | <i>i</i> PrOH: H <sub>2</sub> O (1:1)  | 1        | 90                          | 99                           |
| 8 <sup>b</sup> | <i>i</i> PrOH: H <sub>2</sub> O (1:1)  | 1        | 95                          | 99                           |
| 9              | <i>i</i> PrOH: H <sub>2</sub> O (1:5)  | 1        | 36                          | 99                           |
| 10             | <i>i</i> PrOH: H <sub>2</sub> O (1:10) | 1        | Trace                       | 99                           |

[a] Reaction conditions: Benzonitrile (0.5 mmol), Pd@Au-SiO<sub>2</sub> [Au (0.09 mol%), Pd (0.11 mol%)], solvent (4 mL), 400 rpm, 50°C, [b] 60°C, [c] Determined by GC-MS analysis.

**Table S3** Hydration of benzonitrile with Pd@Au-SiO<sub>2</sub> core-shell nanoparticles as catalysts under liquid phase conditions <sup>a</sup>

| Entry | Substrate (mmol) | Temperature (°C) | Time (min) | Conversion [%] <sup>b</sup> | Selectivity [%] <sup>b</sup> |
|-------|------------------|------------------|------------|-----------------------------|------------------------------|
| 1     | 0.5              | 40               | 60         | 78                          | 99                           |
| 2     | 0.5              | 50               | 60         | 90                          | 99                           |
| 3     | 0.5              | 60               | 20         | 34                          | 99                           |
| 4     | 0.5              | 60               | 40         | 69                          | 99                           |
| 5     | 0.5              | 60               | 60         | 95                          | 99                           |
| 6     | 1                | 60               | 60         | 85                          | 99                           |
| 7     | 0.5              | 70               | 60         | 97                          | 99                           |
| 8     | 0.5              | 80               | 60         | 96                          | 99                           |

[a] Reaction conditions: Pd@Au-SiO<sub>2</sub> [Au (0.09 mol%), Pd (0.11 mol%)], *i*PrOH: H<sub>2</sub>O (1:1) (4 mL) and 400 rpm, [b] Determined by GC-MS analysis

### **Calculation of shell widths from XPS peak intensities**

High-resolution XPS spectra were taken (Figure 5b and 5c), from which the peak areas of C 1s, Pd 3d and Au 4f were measured and the ratios  $A_C/A_{Pd}$ ,  $A_C/A_{Au}$  and  $A_{Pd}/A_{Au}$  were calculated.

where,  $A_C$  = Absorption intensity of C<sub>1s</sub> peak,

$A_{Pd}$  = Absorption intensity of Pd<sub>3d<sub>3/2</sub></sub> peak, and

$A_{Au}$  = Absorption intensity of Au<sub>4f<sub>5/2</sub></sub> peak.

This reference method was adopted from a recent work by Yan et al.<sup>1</sup> that involved a similar calculation<sup>2</sup> with XPS binding energies for thiol functionalized Au NPs.



# GC-Mass spectra of Products

## Hydrogenation

### 4-chloroaniline

Instrument : GCMSD  
Sample Name: HM27  
Misc Info :  
Vial Number: 1

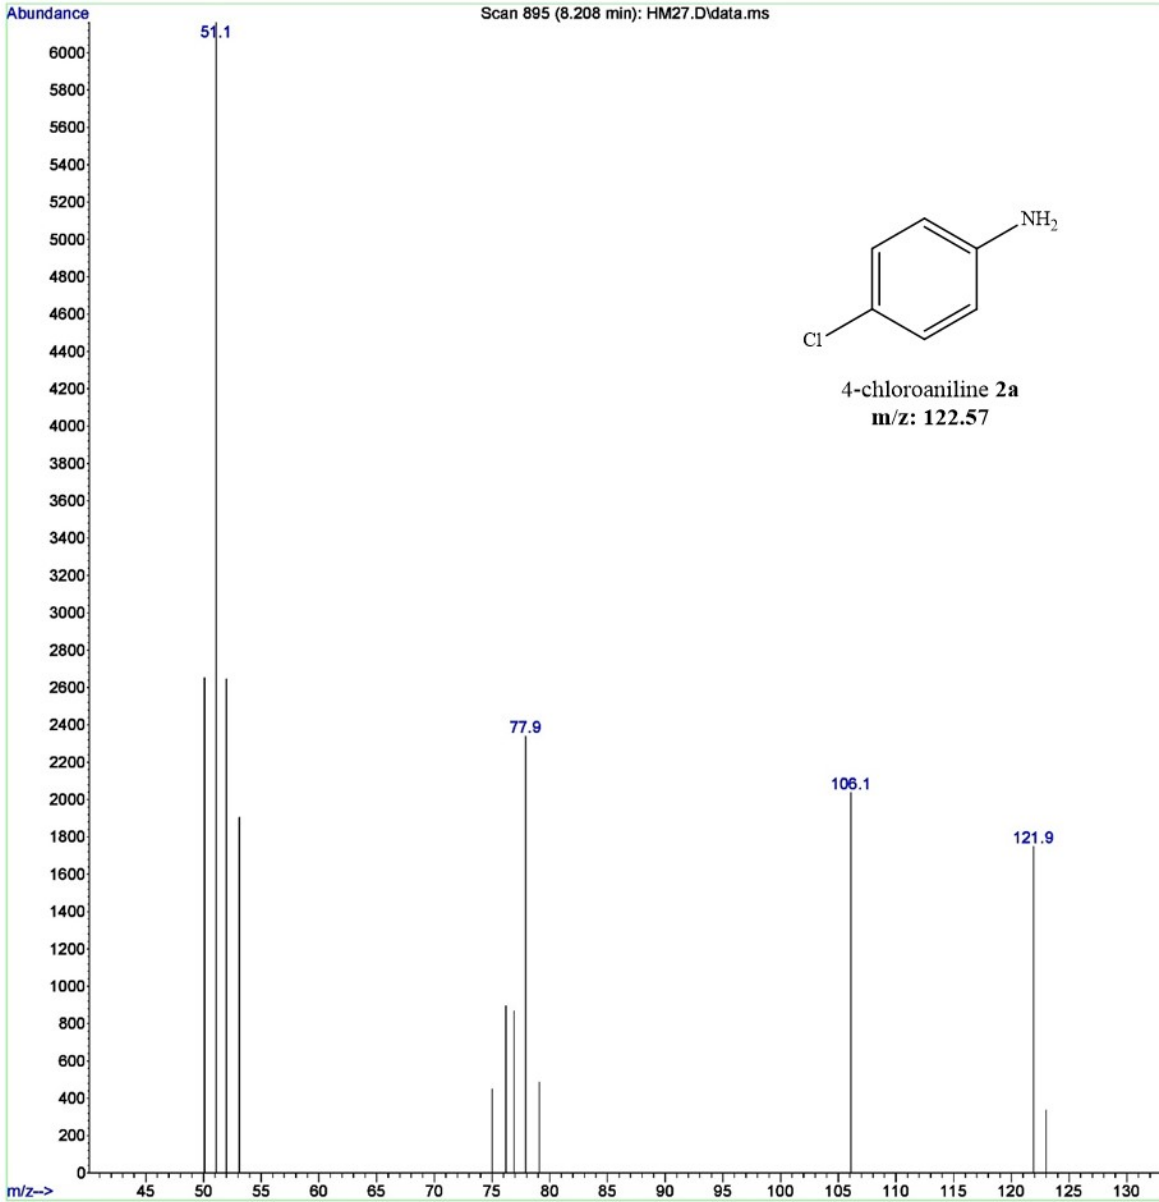

## 4-bromoaniline

Instrument : GCMSD  
Sample Name: GNB-L  
Misc Info :  
Vial Number: 1

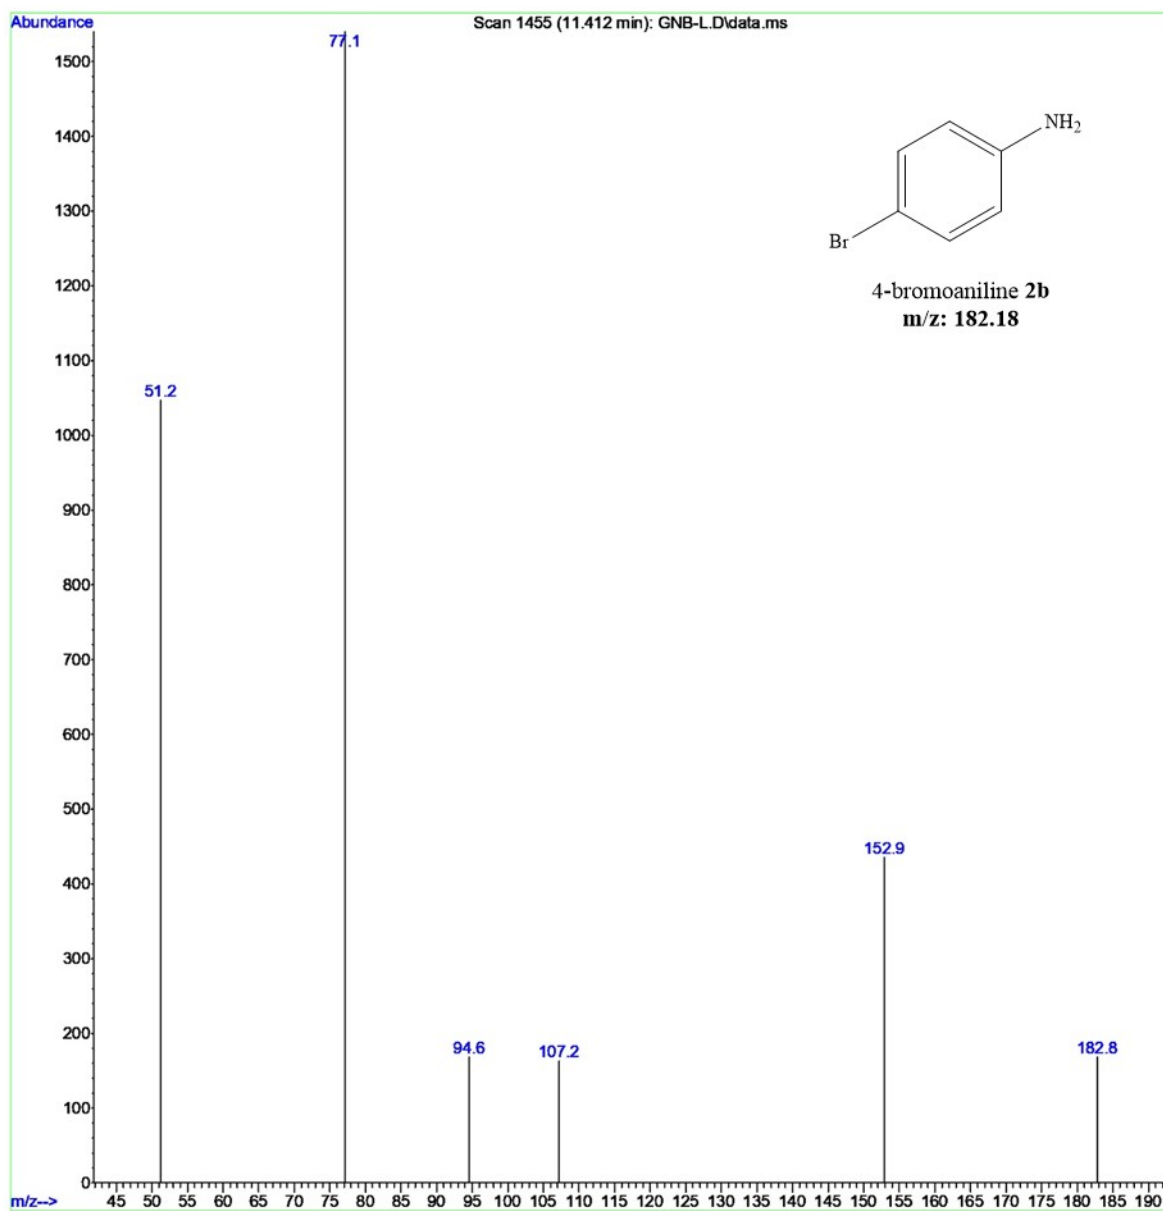

# 4-fluoroaniline

Instrument : GCMSD  
Sample Name: 1-Fluoro-4-Nitrobenzene  
Misc Info :  
Vial Number: 7

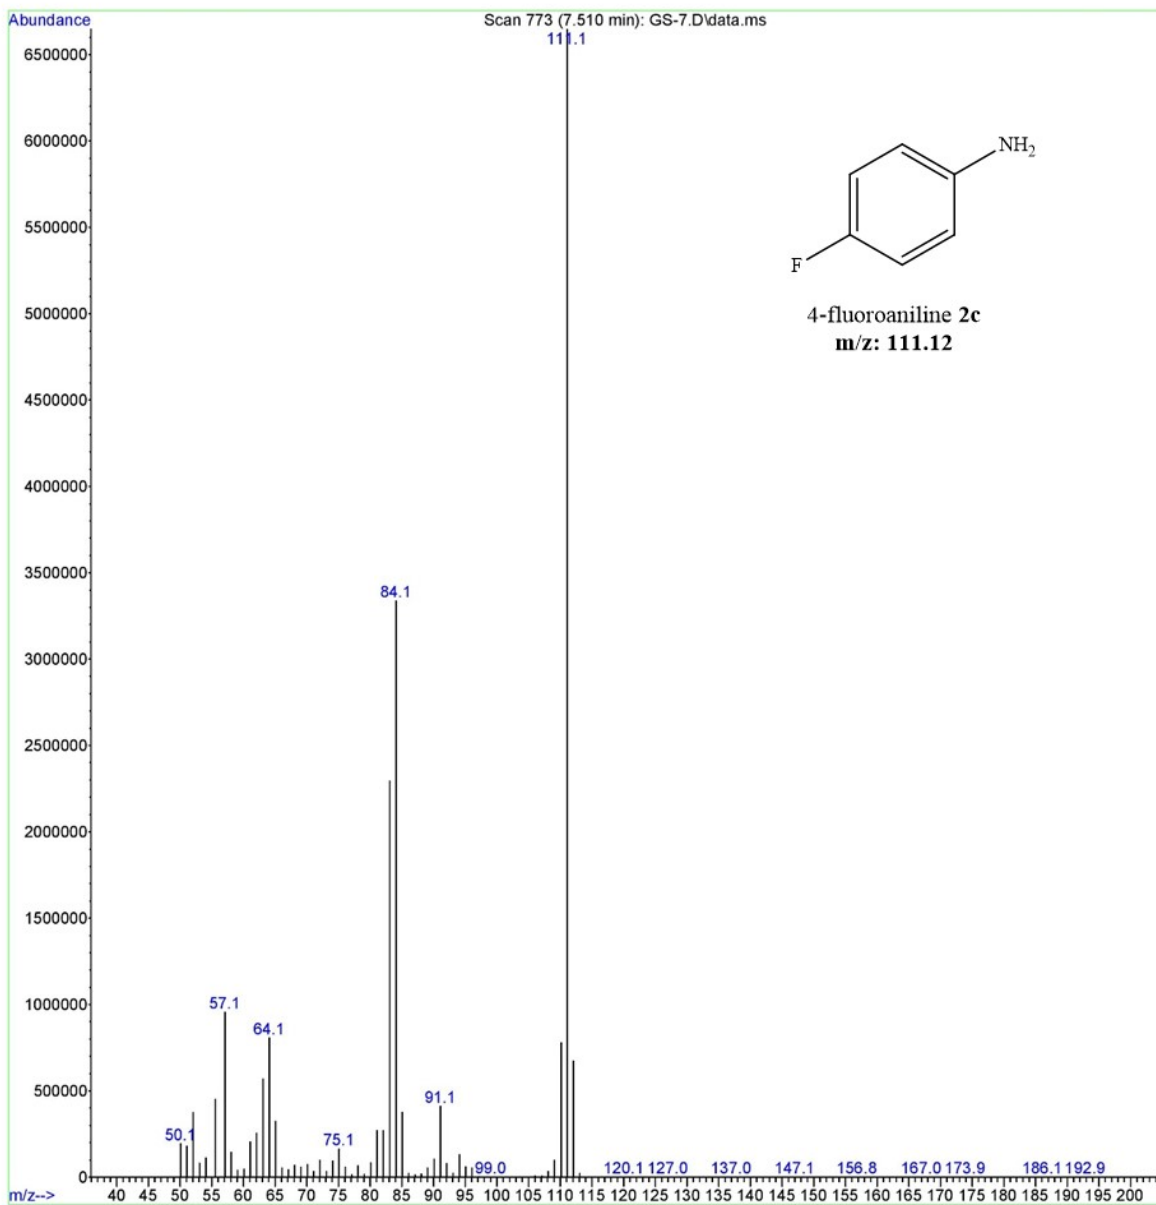

### 3-chloro-4-nitroaniline

Instrument : GCMSD  
Sample Name: 1-Chloro-2,5-Dinitrobenzene  
Misc Info :  
Vial Number: 5

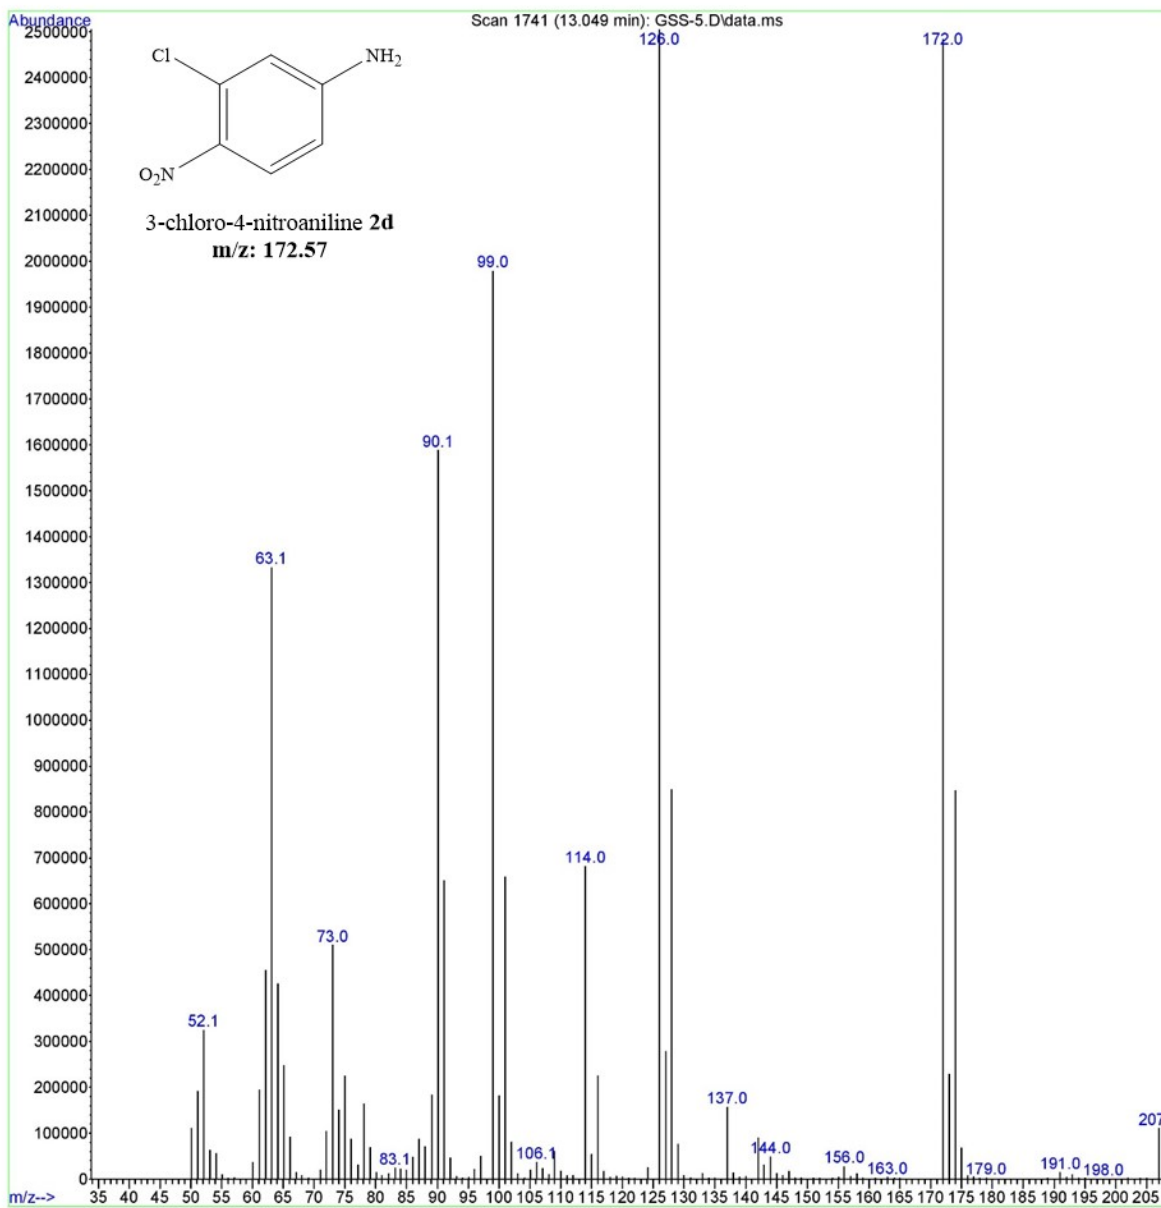

## 2-chloro-4-nitroaniline

Instrument : GCMSD  
Sample Name: 1-Chloro-2,5-Dinitrobenzene  
Misc Info :  
Vial Number: 5

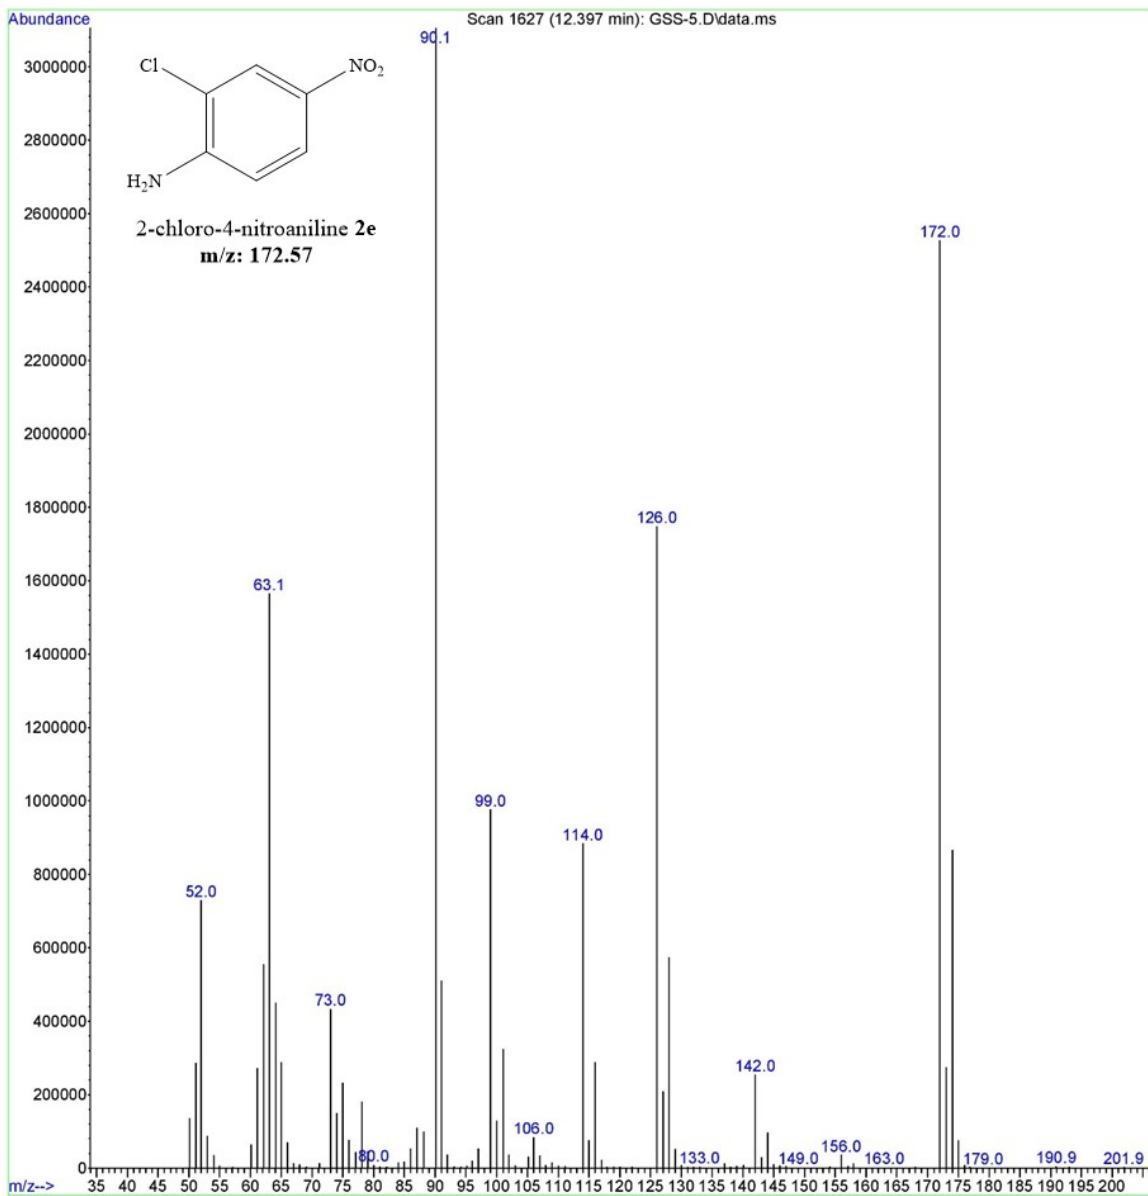

## 2,5-dichloroaniline

Instrument : GCMSD  
Sample Name: 2,5-Dichloro-1-Nitrobenzene  
Misc Info :  
Vial Number: 3

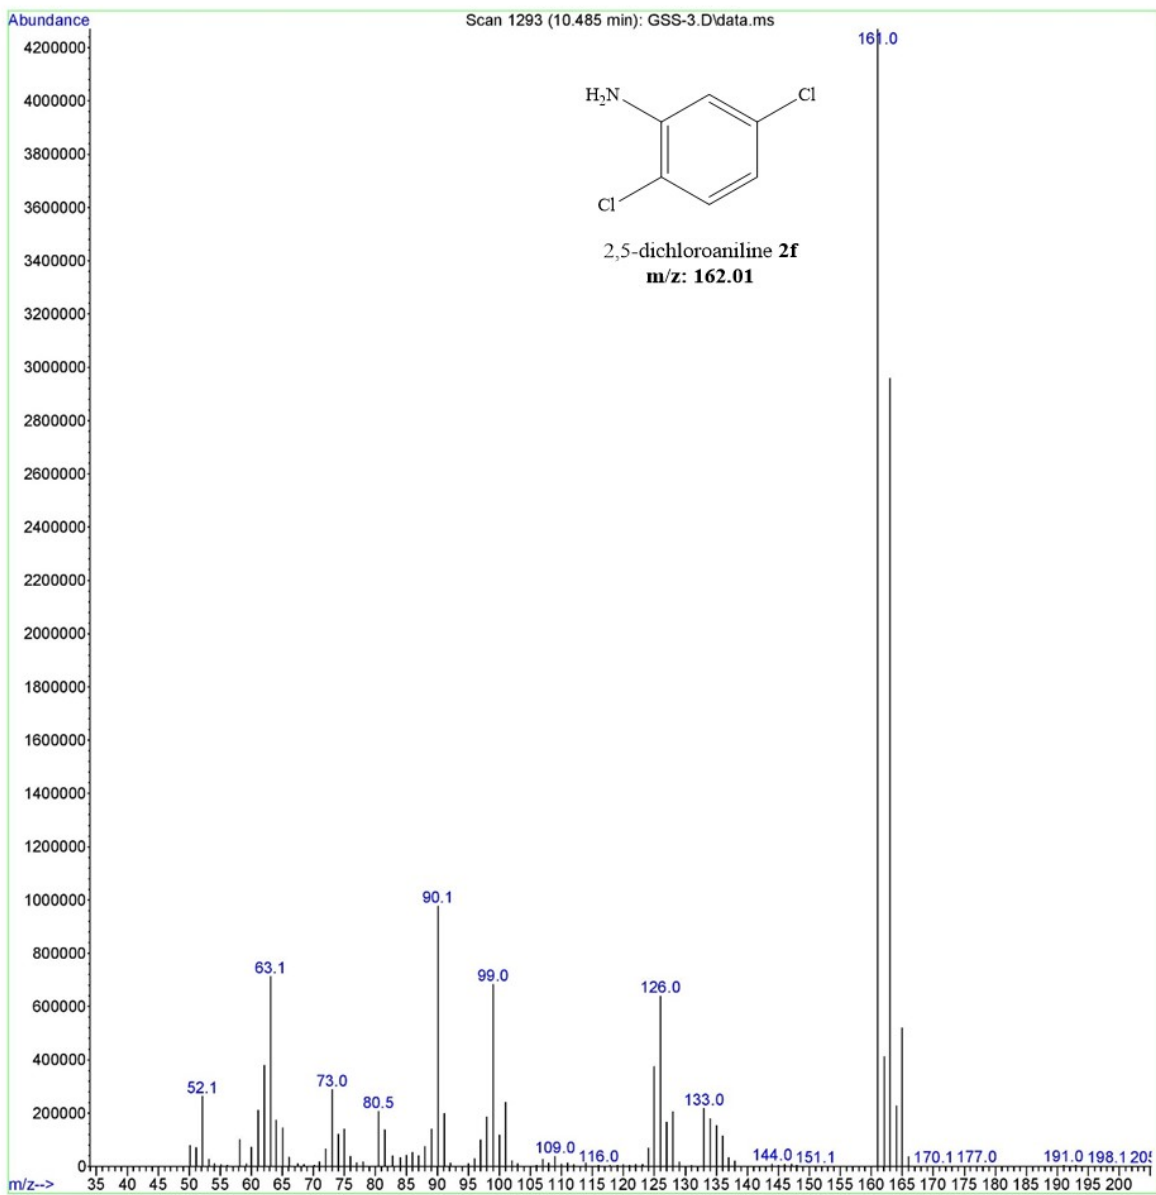

# 4-aminobenzonitrile

Instrument : GCMSD  
Sample Name: 4-Nitrobenzonitrile  
Misc Info :  
Vial Number: 1

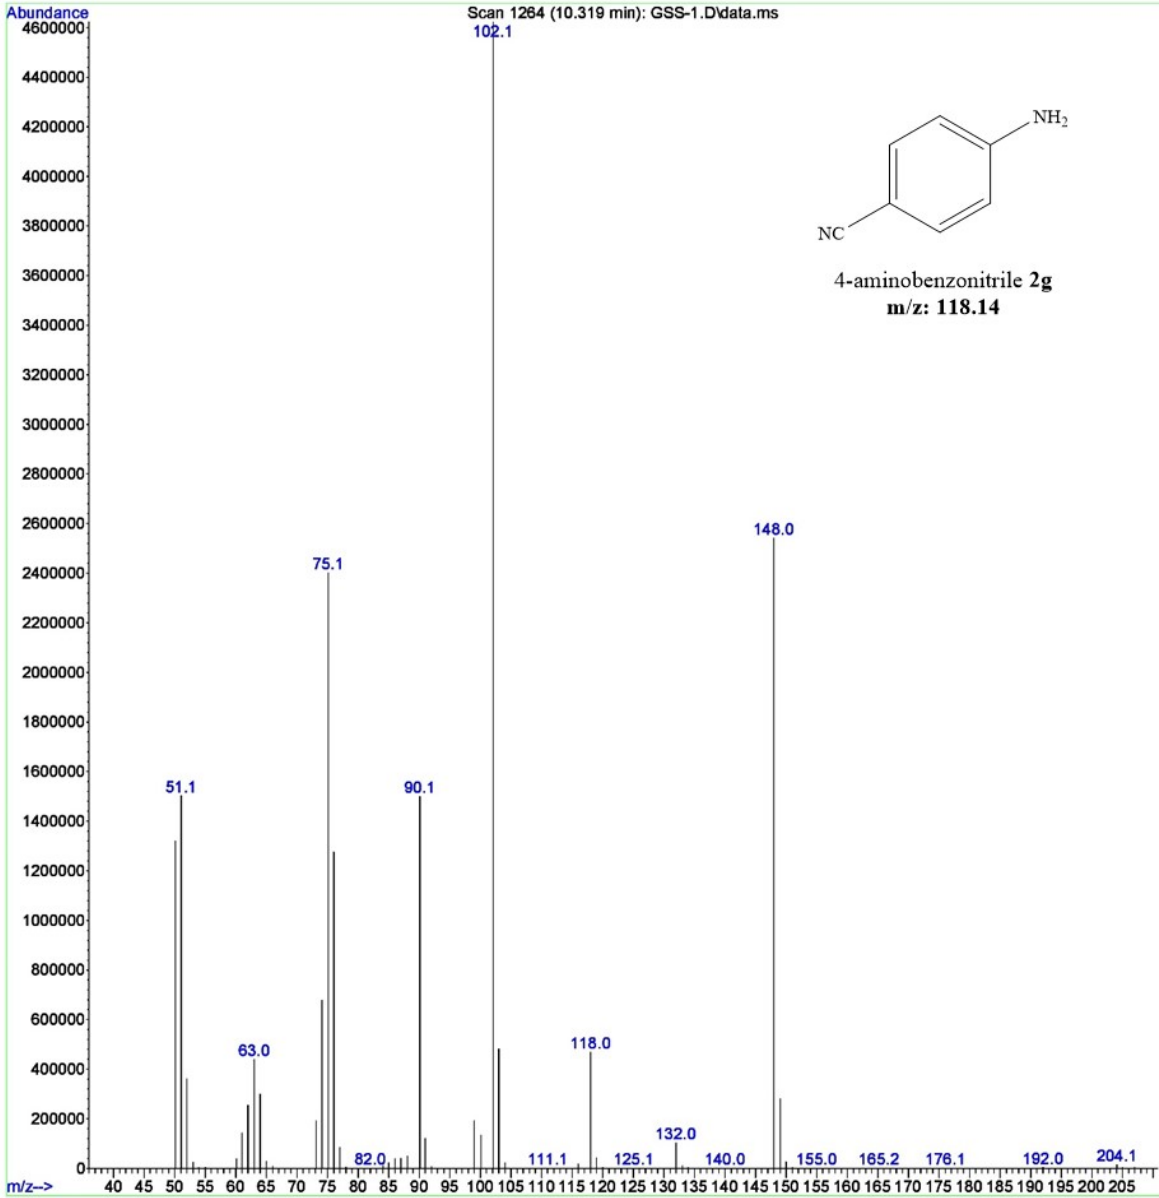

## 4-methoxyaniline

Instrument : GCMSD  
Sample Name: 4-Nitroanisole  
Misc Info :  
Vial Number: 9

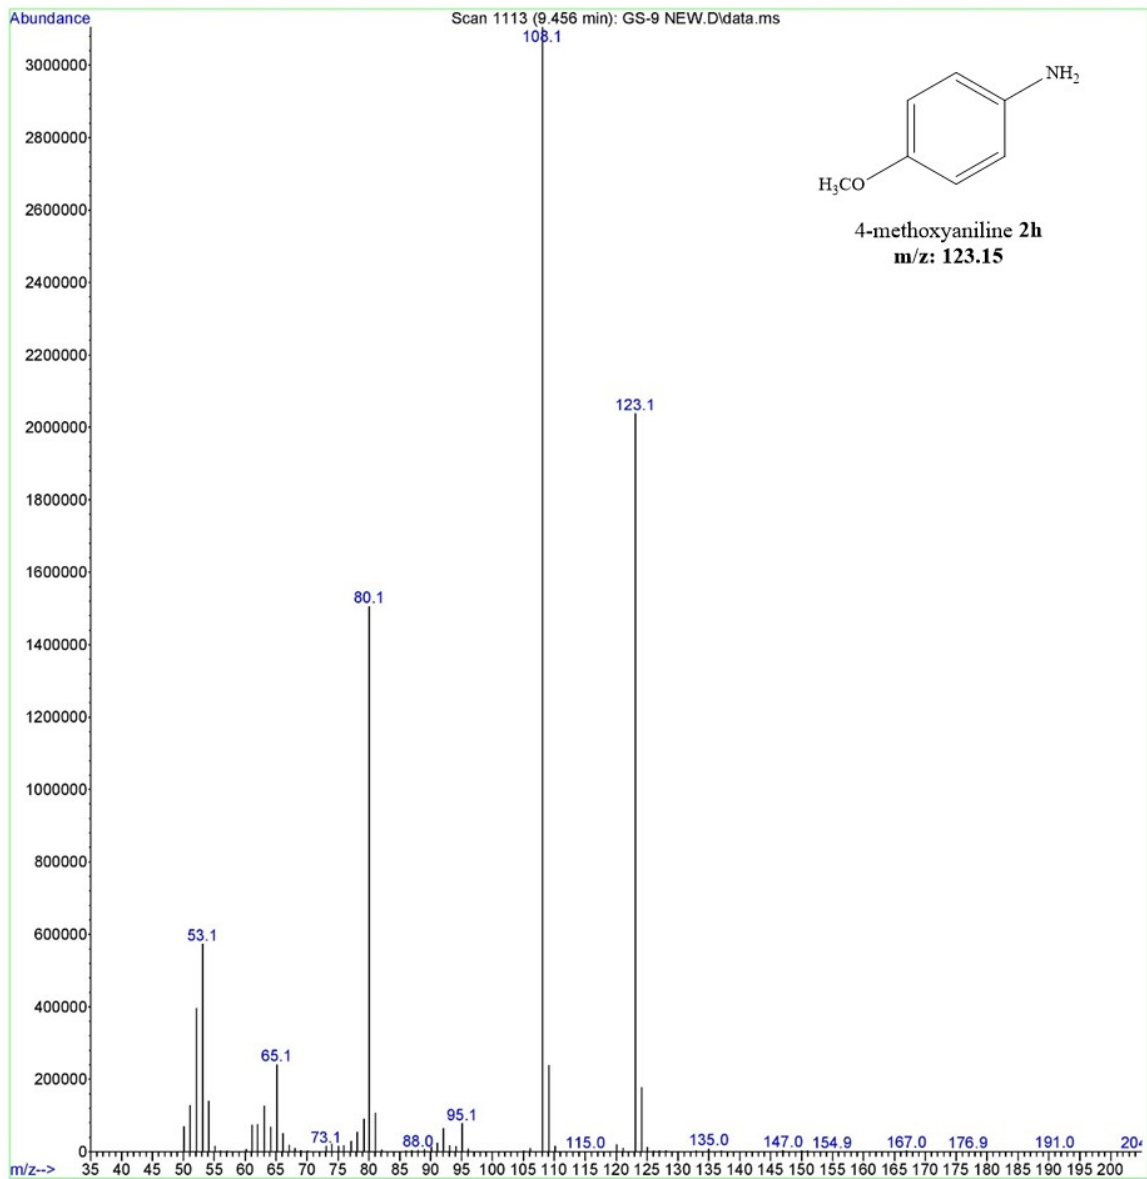



## 4-methylaniline

Instrument : GCMSD  
Sample Name: 4-Nitrotoluene  
Misc Info :  
Vial Number: 4

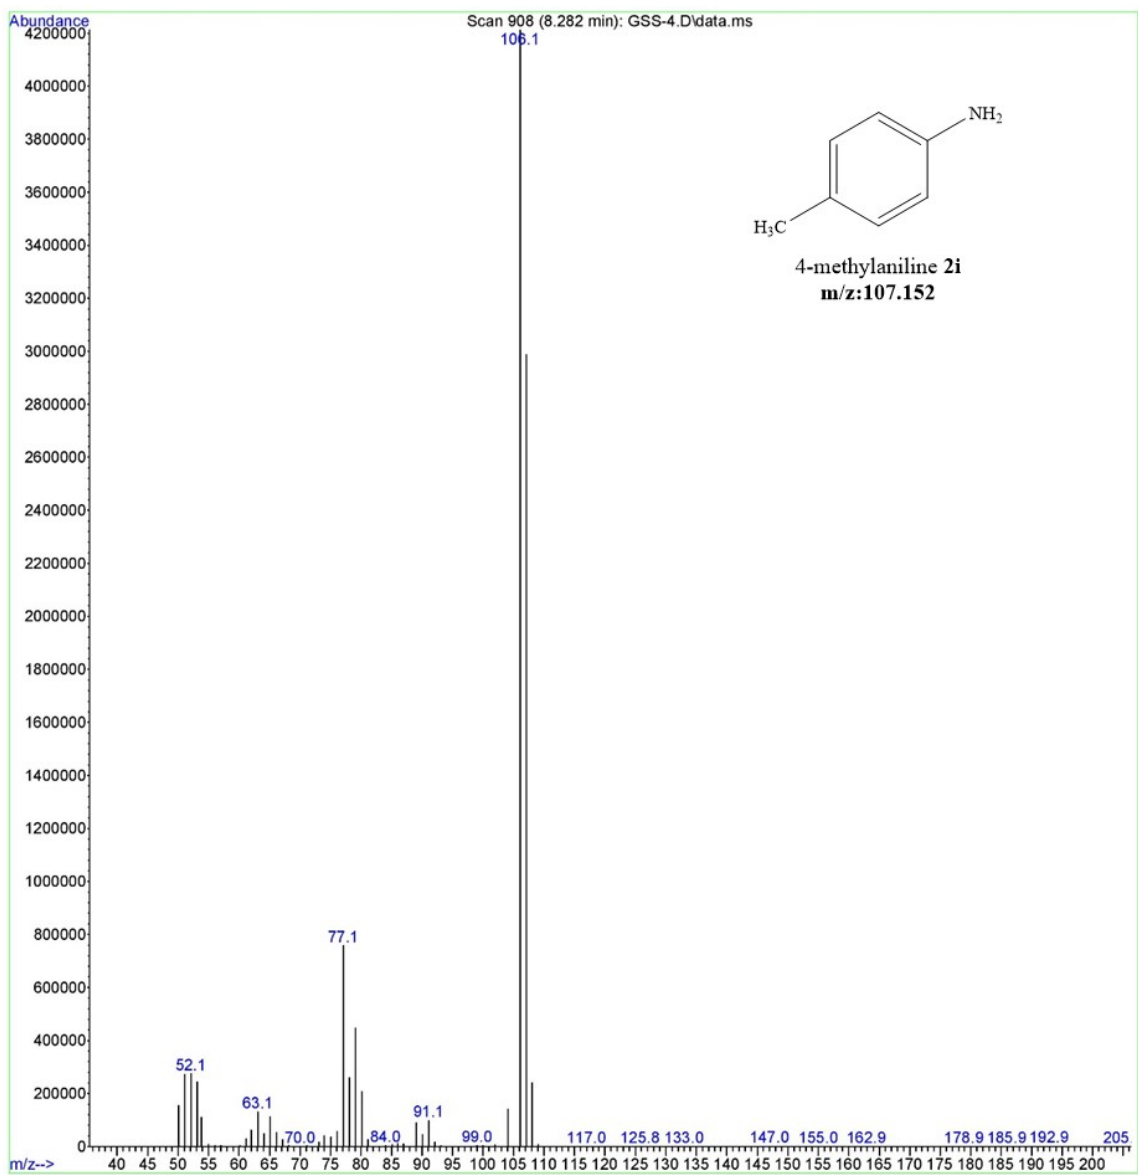

## 4-aminobenzaldehyde

Instrument : GCMSD  
Sample Name: 4-Nitrobenzaldehyde  
Misc Info :  
Vial Number: 8

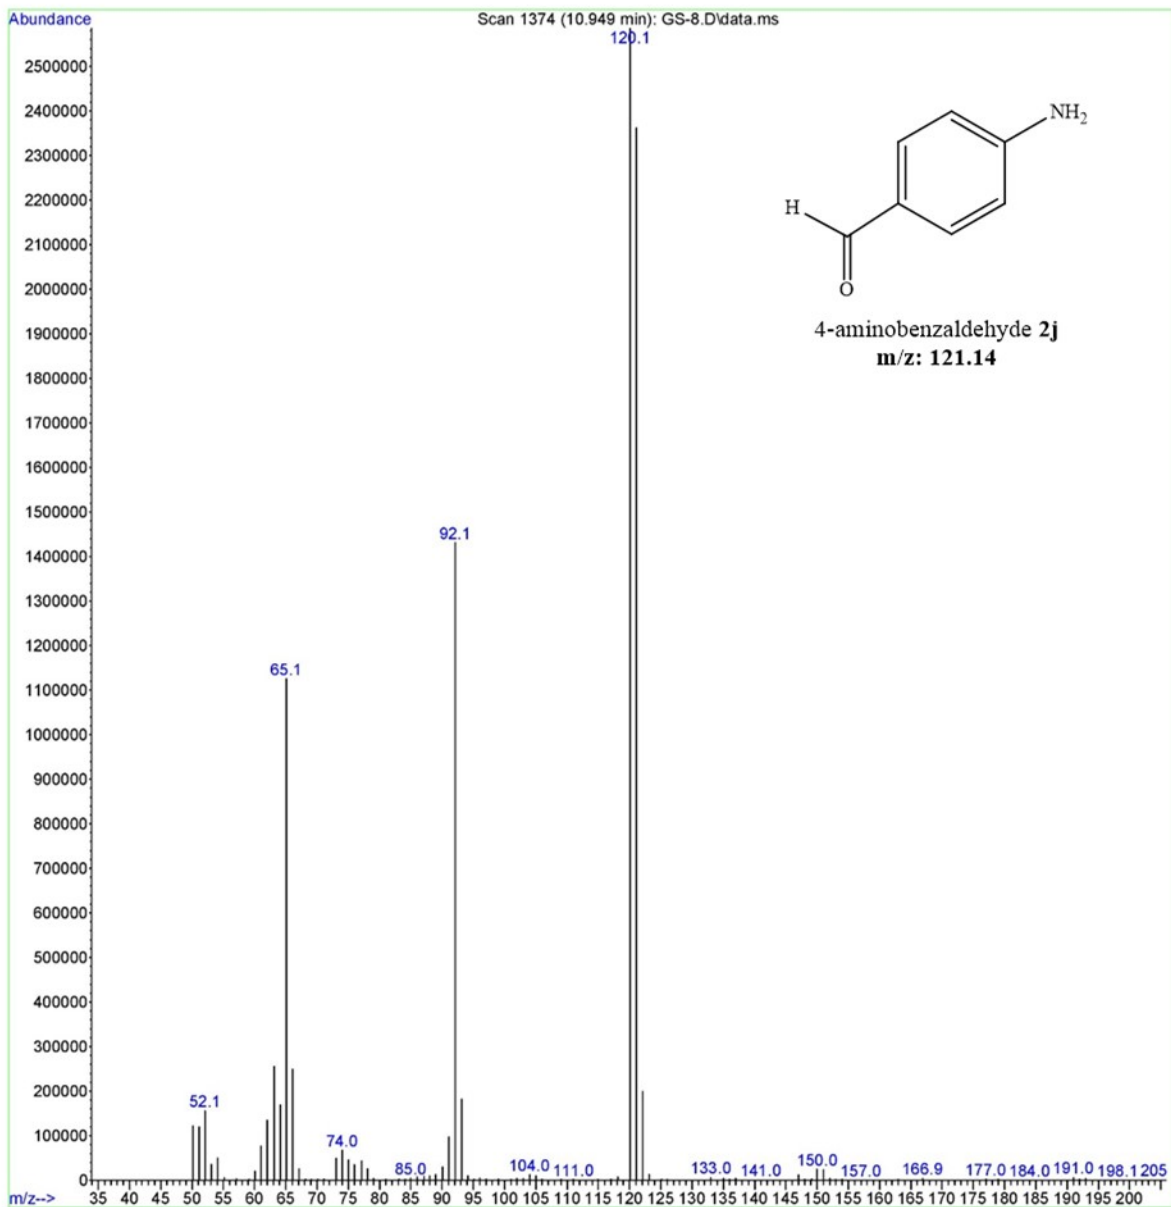

## 4-aminoacetophenone

Instrument : GCMSD  
Sample Name: 4-Nitroacetophenon  
Misc Info :  
Vial Number: 2

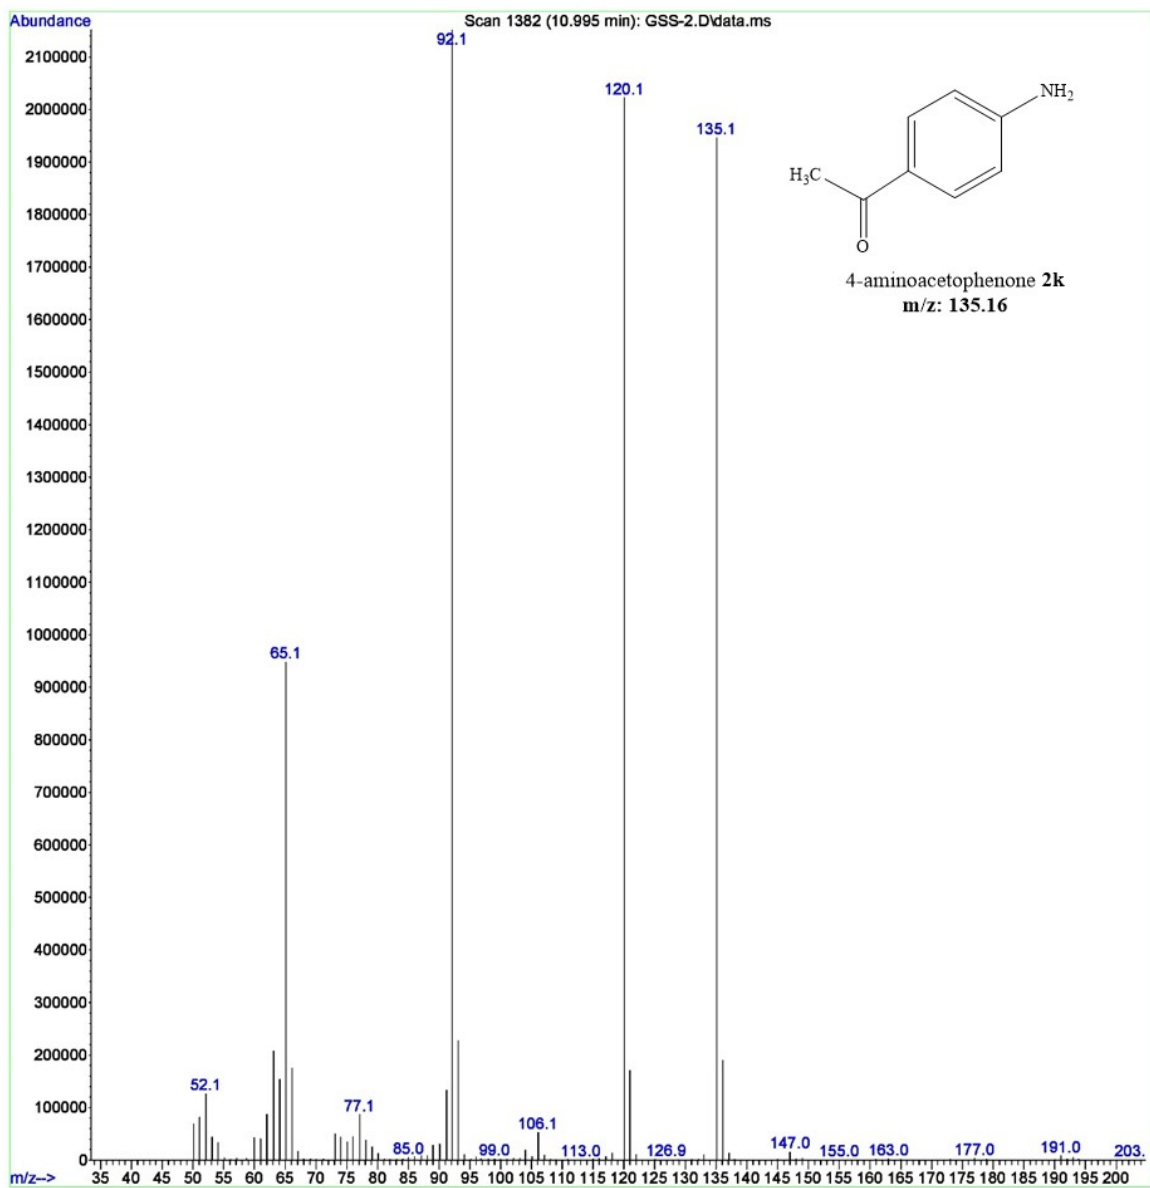

# 4-aminobenzoic acid

Instrument : GCMSD  
Sample Name: 4-nitrobenzoic acid  
Misc Info :  
Vial Number: 6

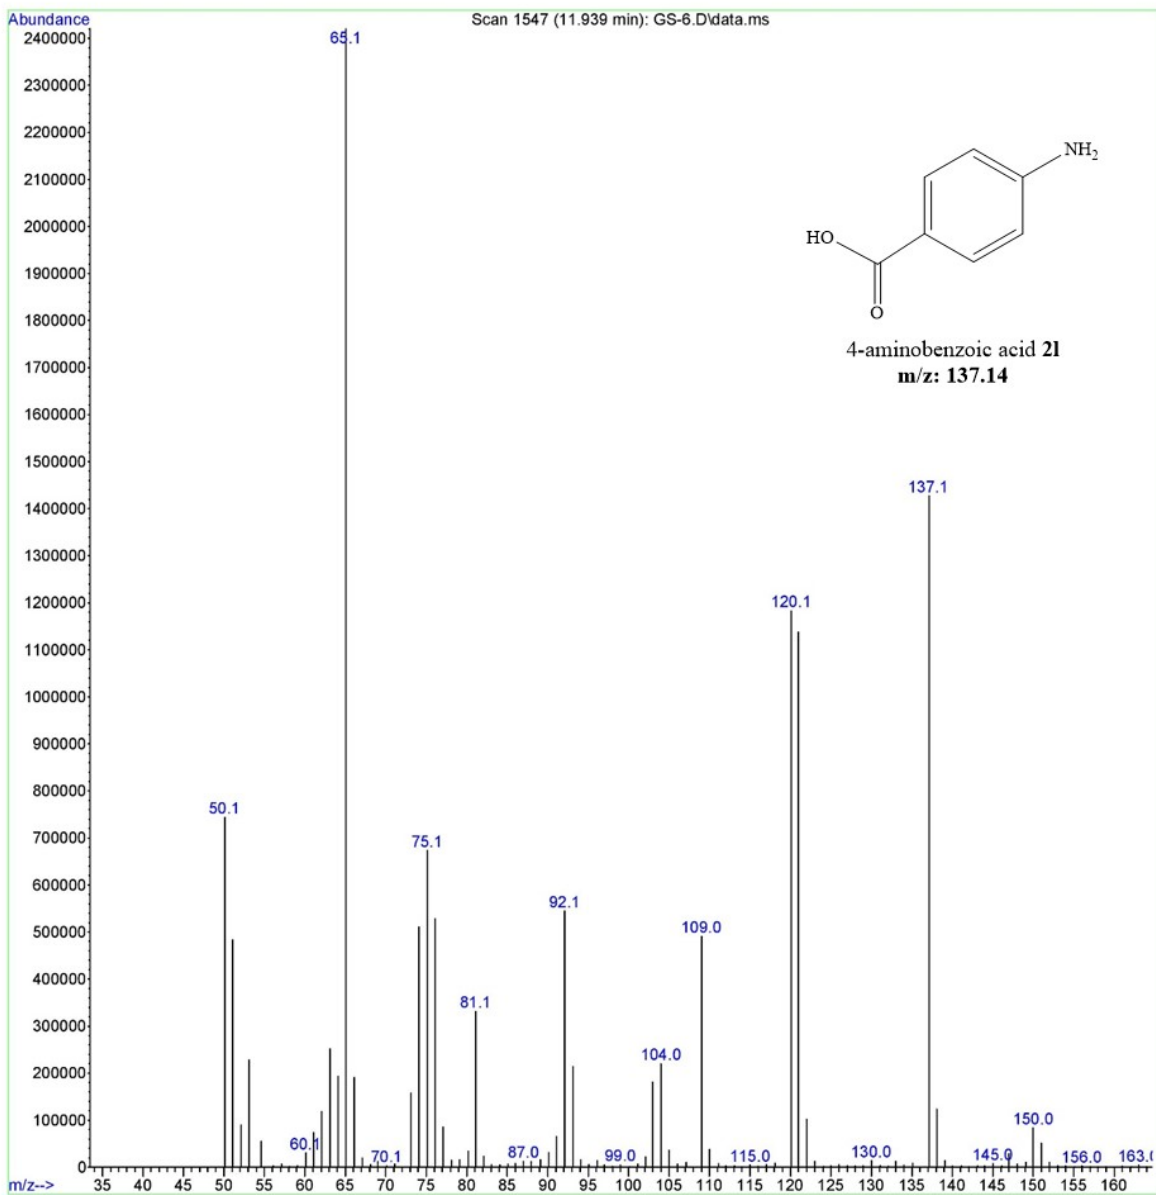

## Nitrile Hydration

### Nicotinamide

Instrument : GCMSD  
Sample Name: HM27  
Misc Info :  
Vial Number: 1

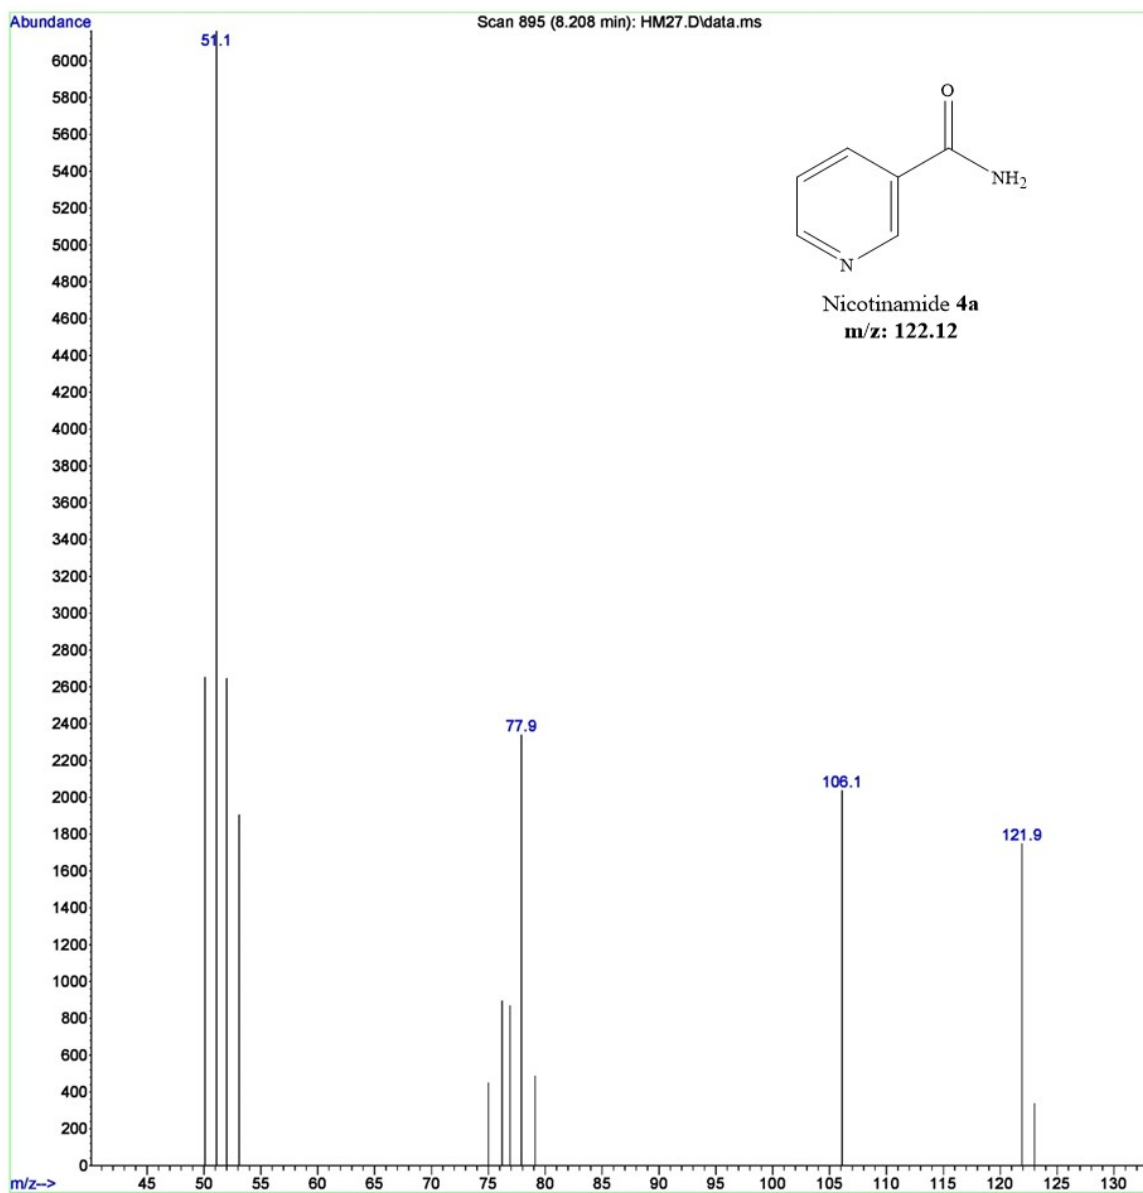

# Isonicotinamide

Instrument : GCMSD  
Sample Name: GNB-F  
Misc Info :  
Vial Number: 1

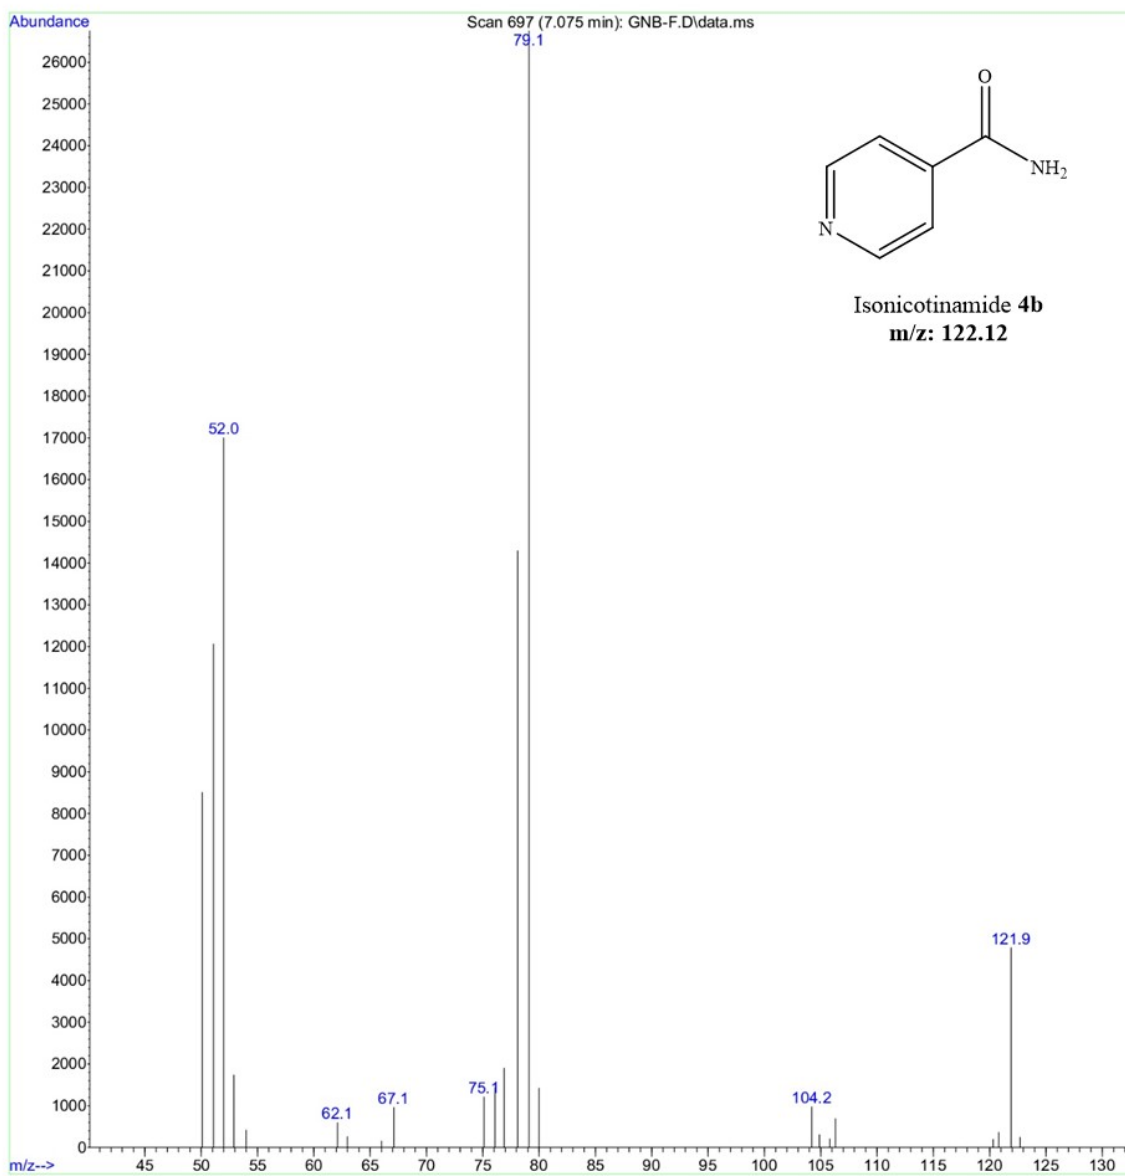

# Picolinamide

Instrument : GCMSD  
Sample Name: CB-1  
Misc Info :  
Vial Number: 1

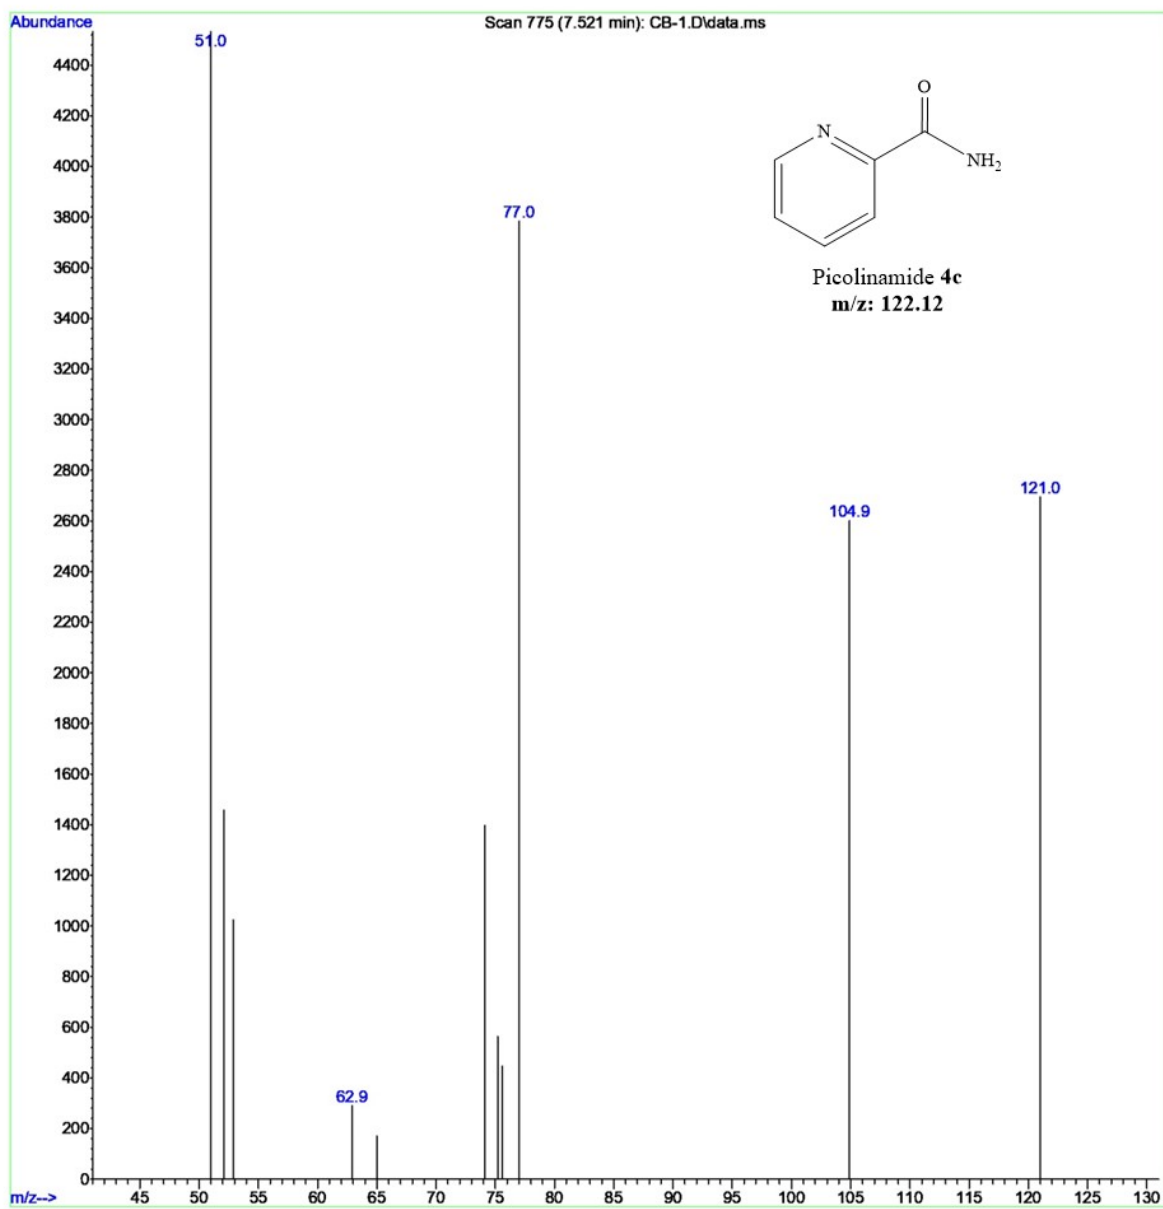

## 4-fluorobenzamide

Instrument : GCMSD  
Sample Name: HM-28  
Misc Info :  
Vial Number: 1

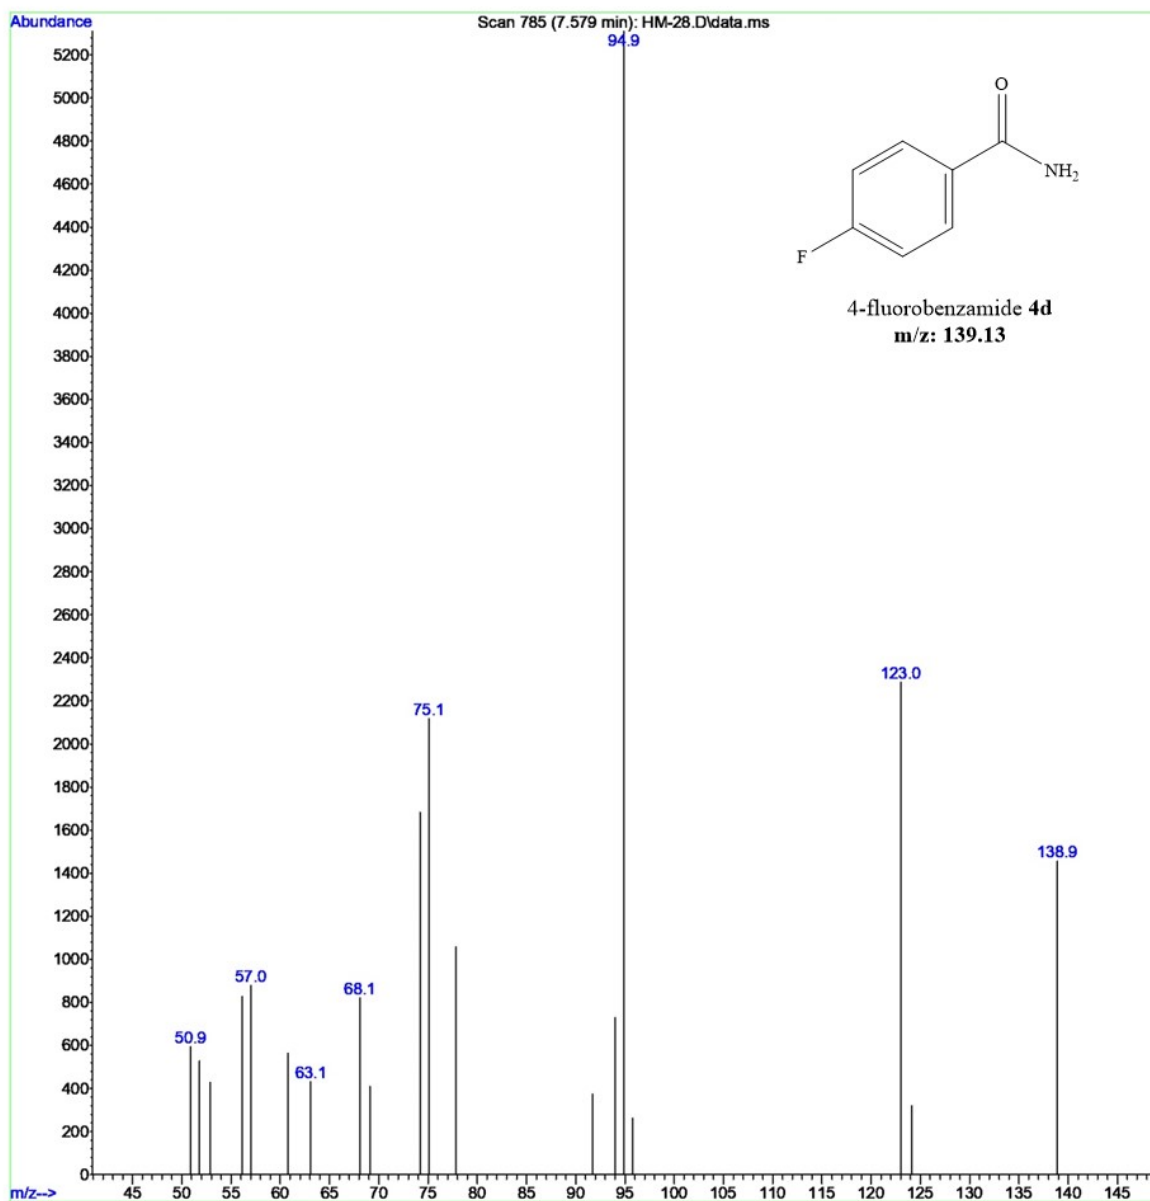



# 4-chlorobenzamide

Instrument : GCMSD  
Sample Name: CC  
Misc Info :  
Vial Number: 1

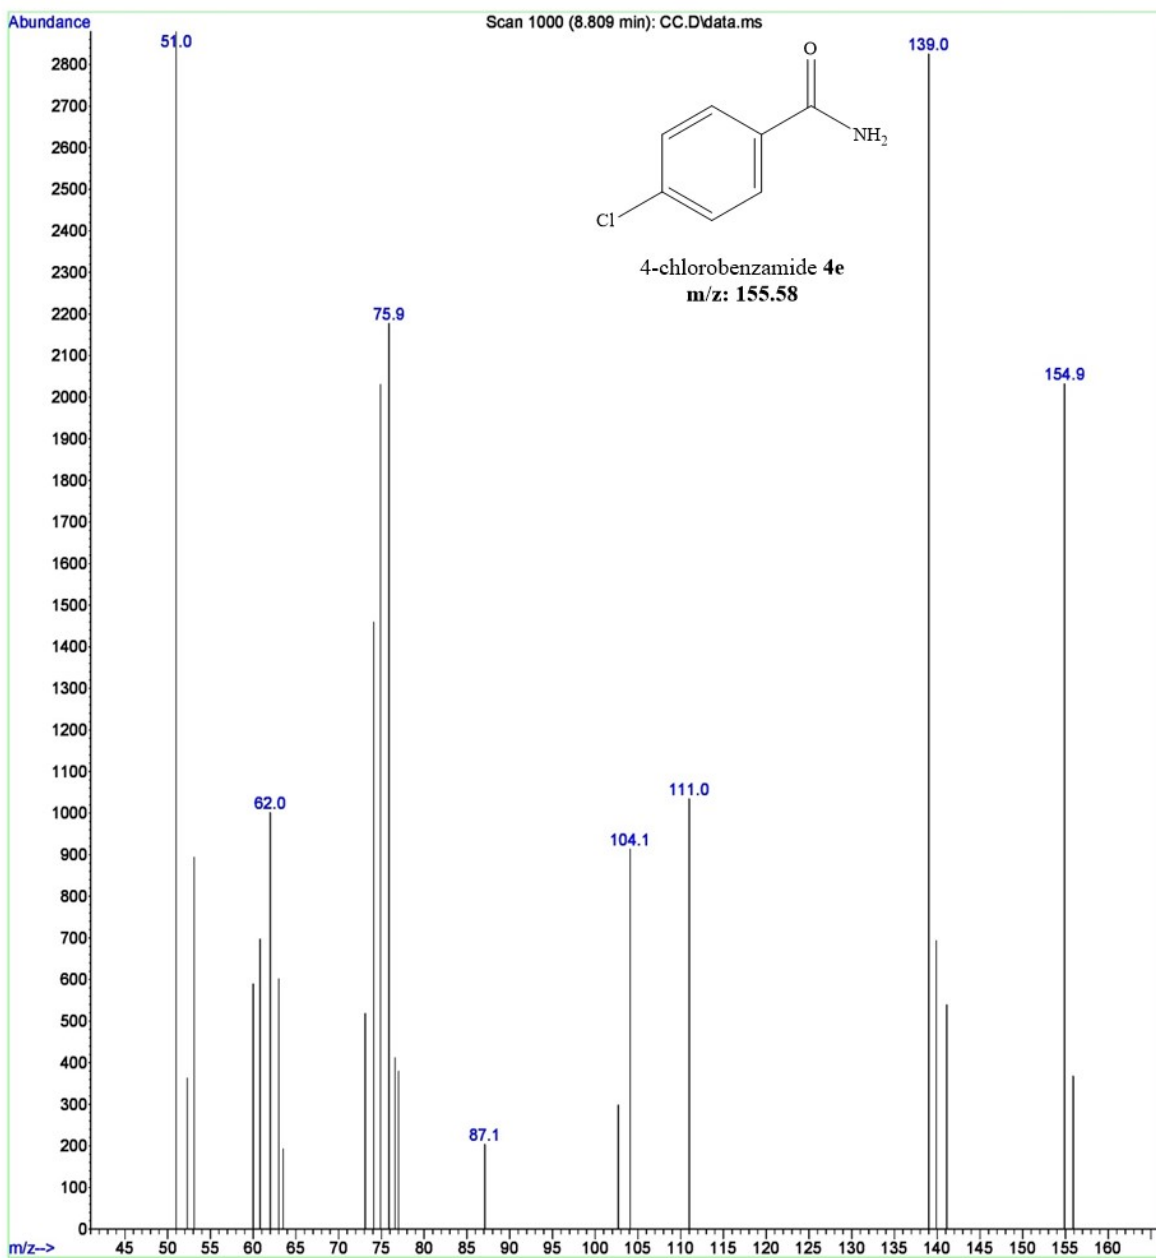

# 4-bromobenzamide

Instrument : GCMSD  
Sample Name: CB  
Misc Info :  
Vial Number: 1

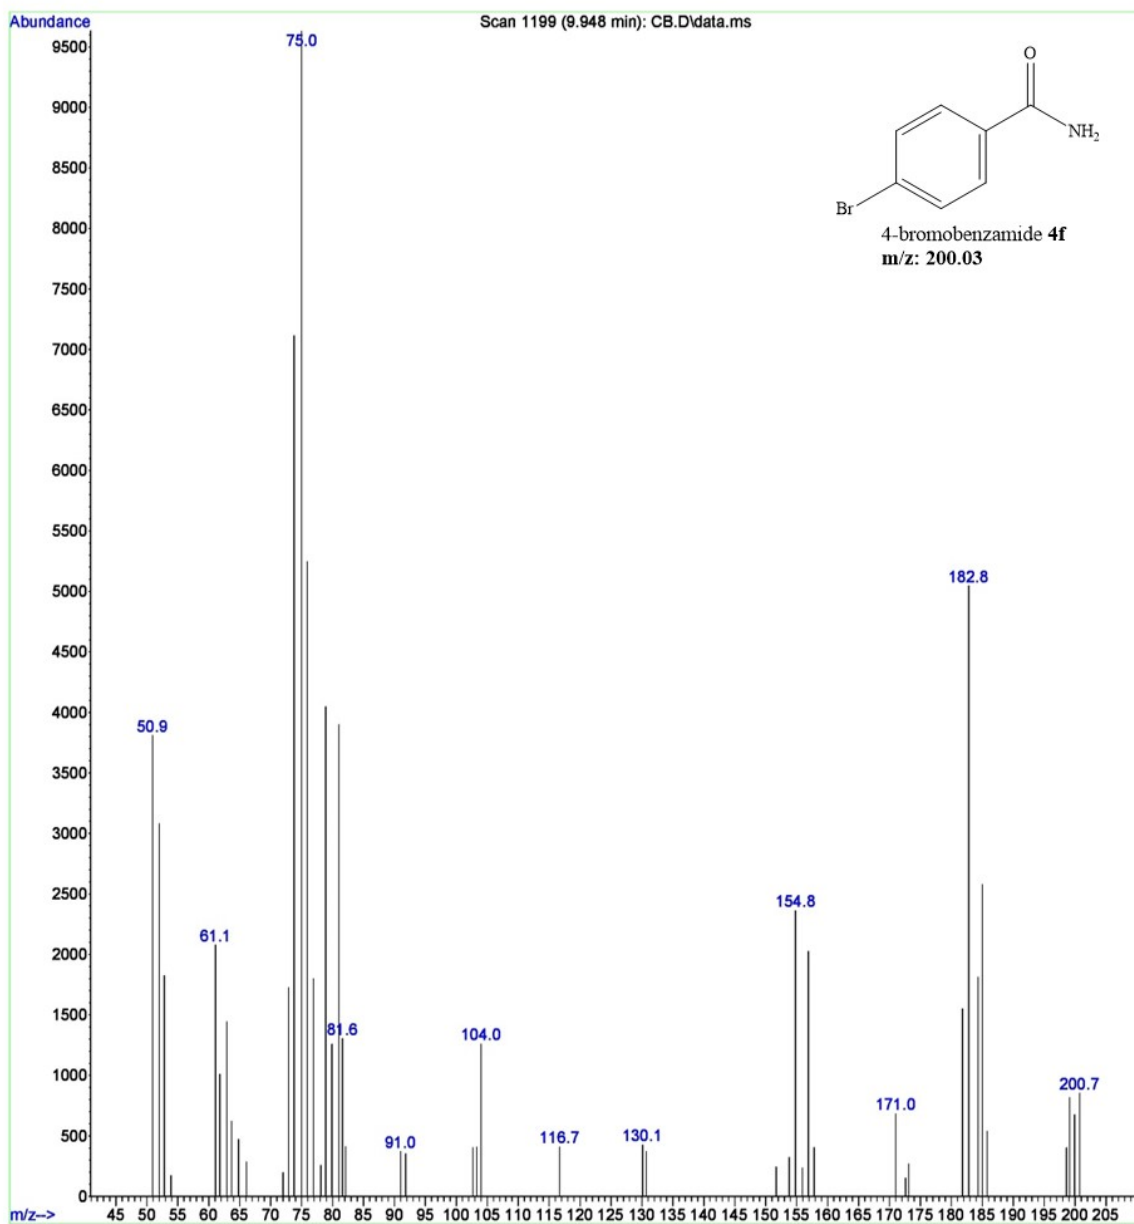

# 4-methylbenzamide

Instrument : GCMSD  
Sample Name: 38  
Misc Info :  
Vial Number: 1

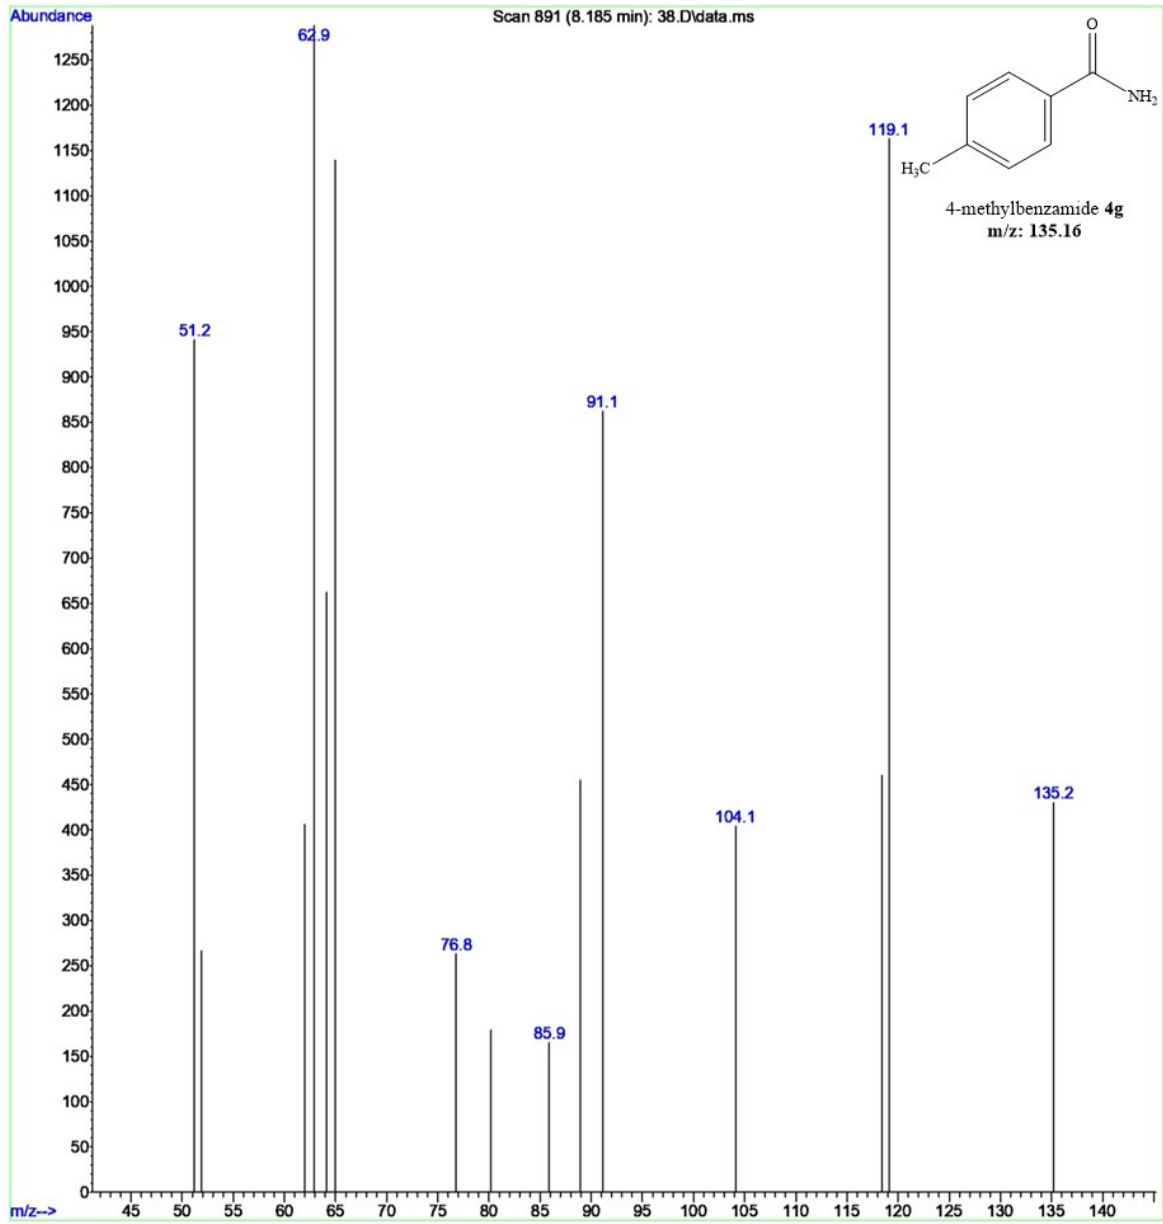

# Benzamide

Instrument: GCMSD  
Sample Name: DS2  
Misc Info :  
Vial Number: 1

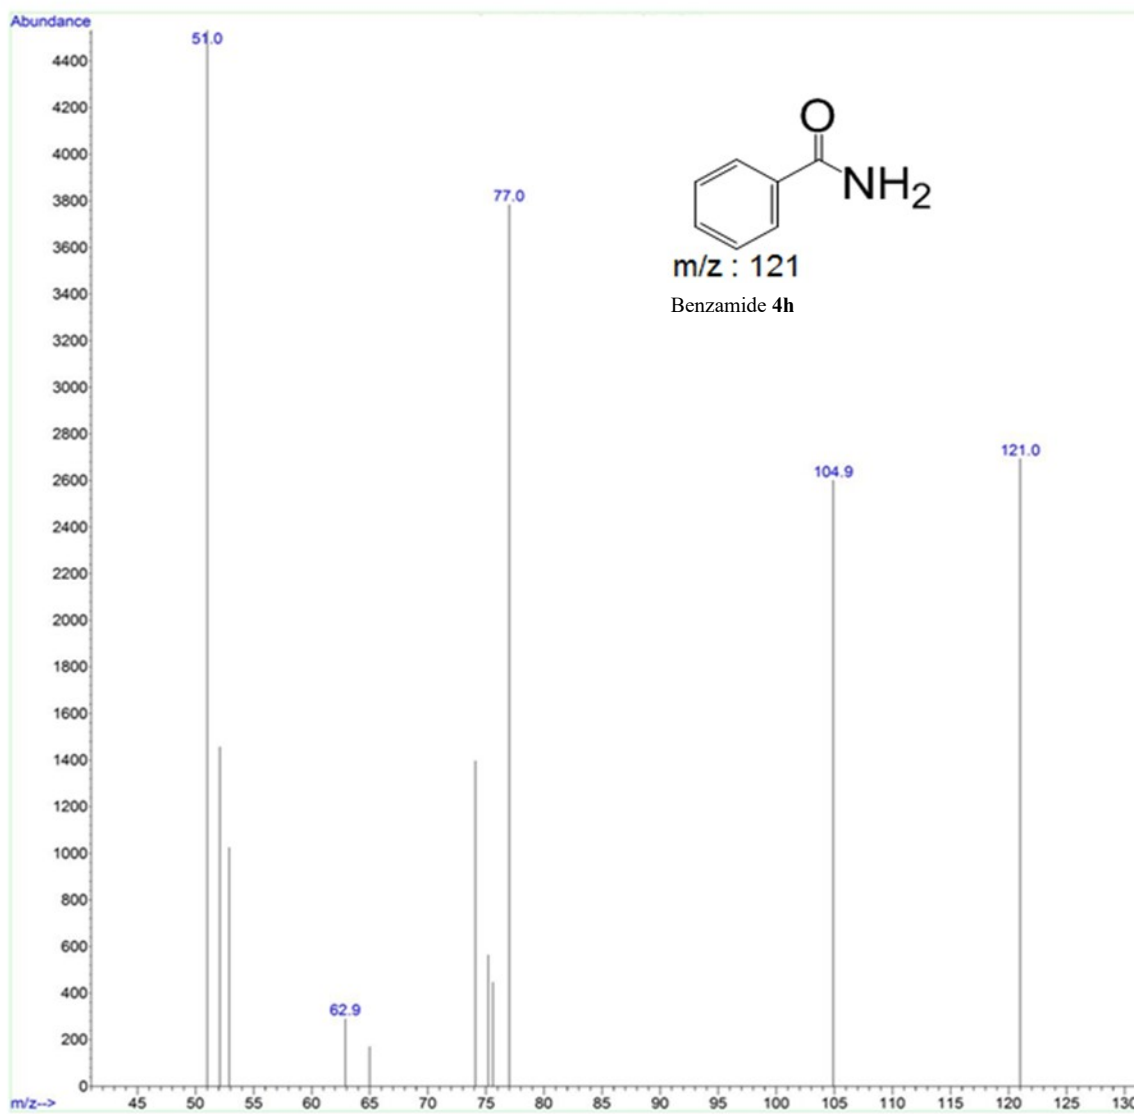

## 4-methoxybenzamide

Instrument : GCMSD  
Sample Name: GNB-K  
Misc Info :  
Vial Number: 1

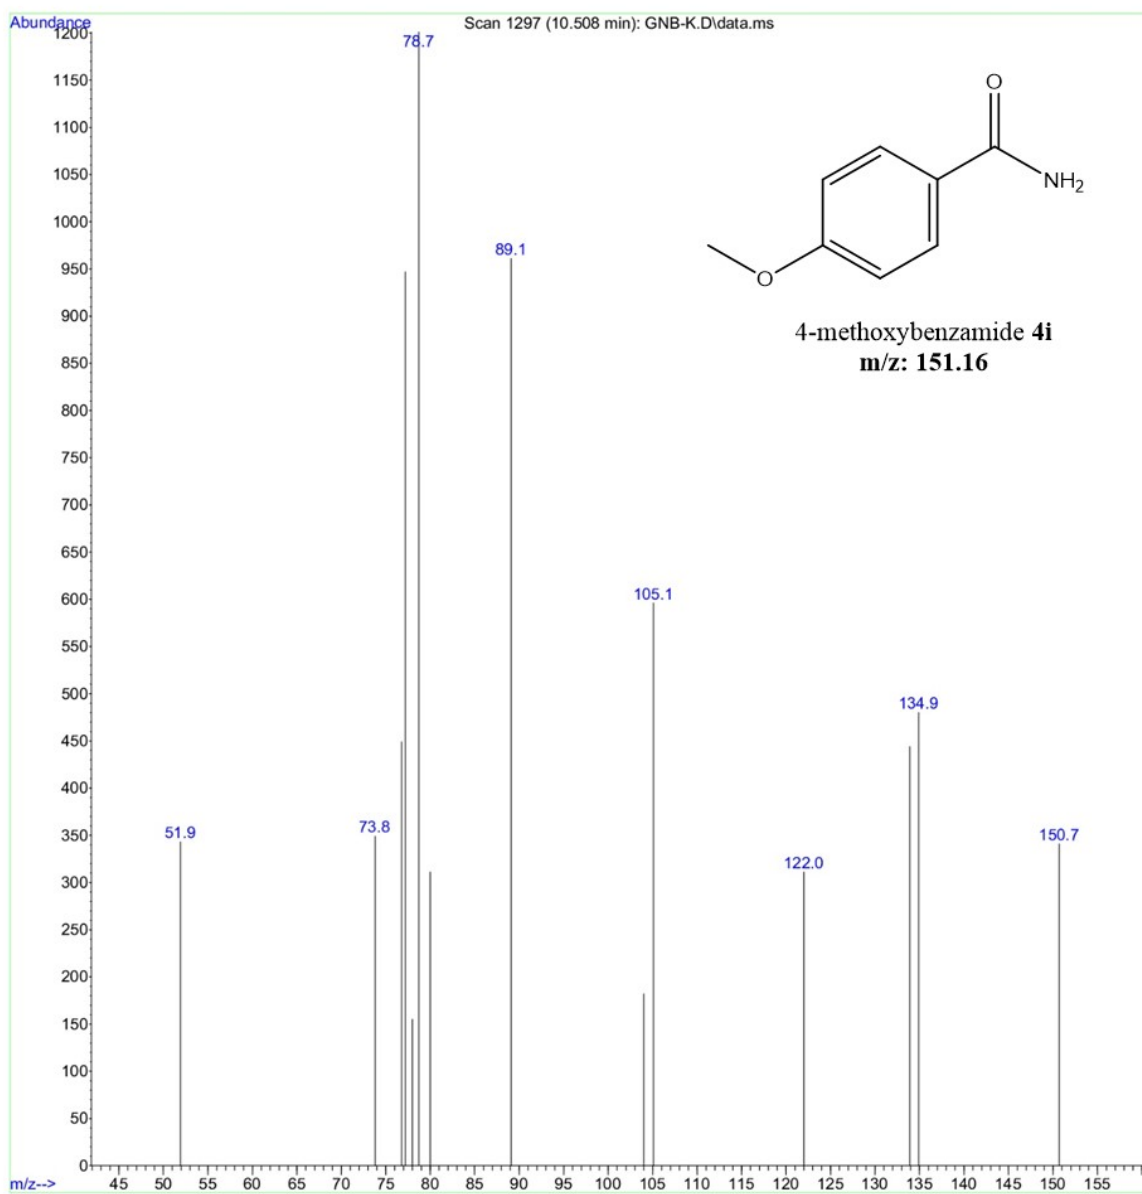

## 4-nitrobenzamide

Instrument : GCMSD  
Sample Name: GNB-D  
Misc Info :  
Vial Number: 1

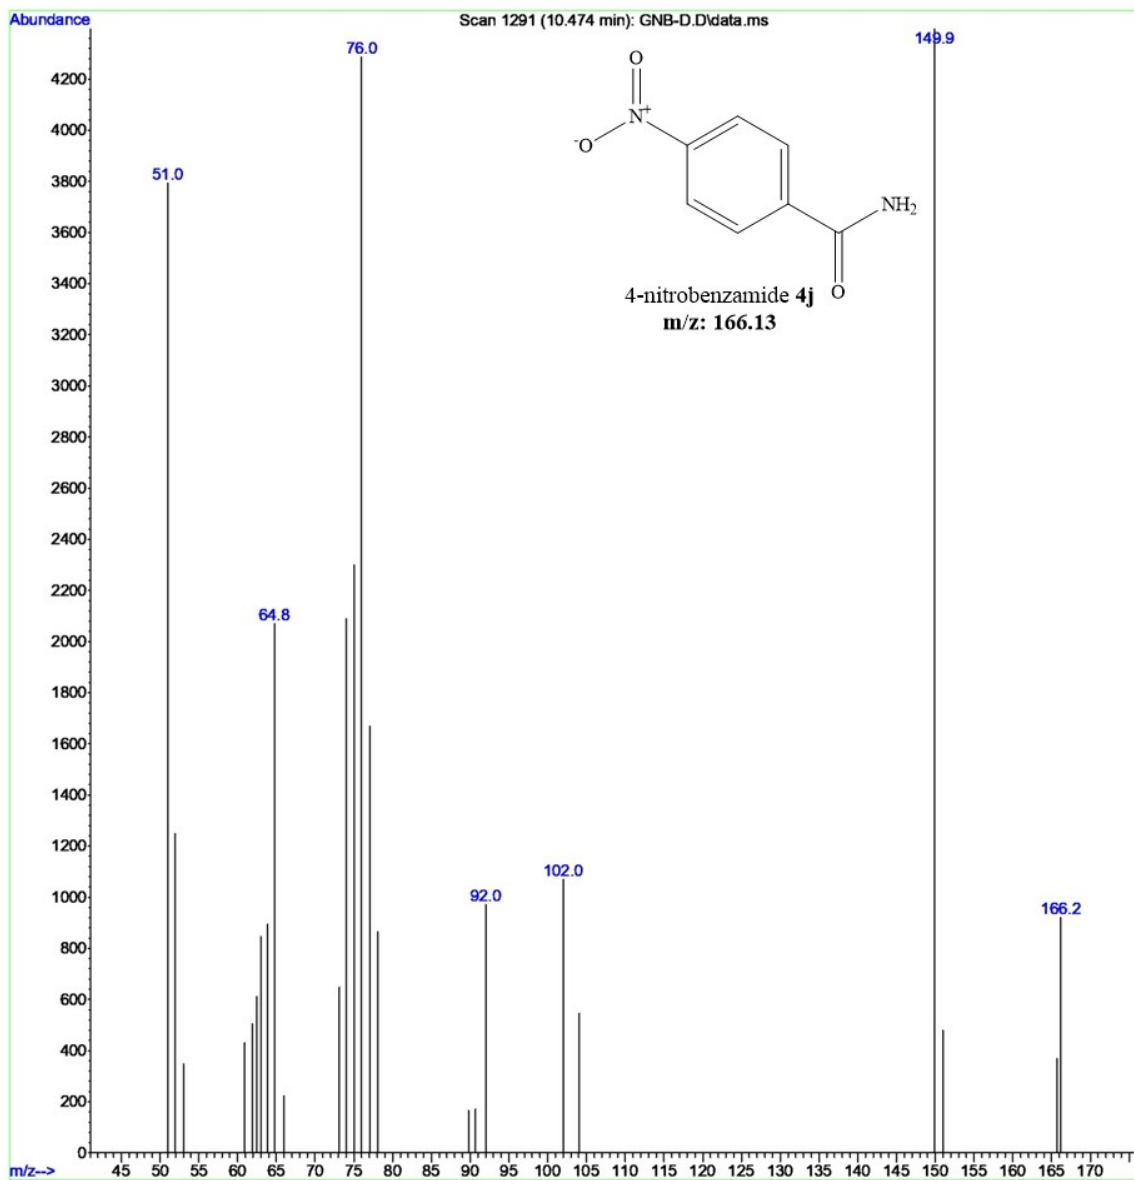

## 4-aminobenzamide

Instrument : GCMSD  
Sample Name: GNB-K  
Misc Info :  
Vial Number: 1

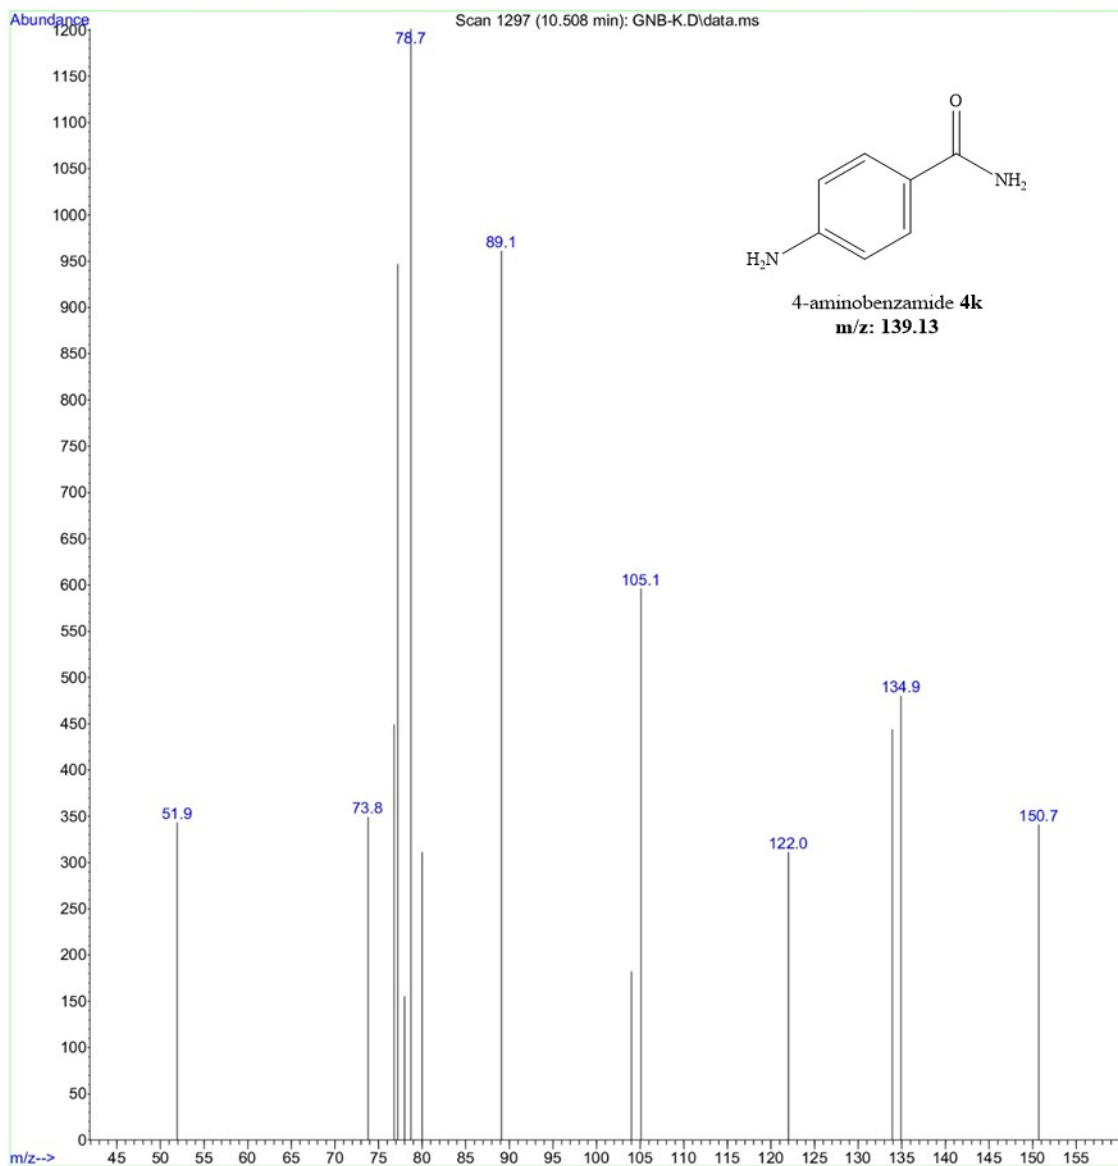

## 4-(bromomethyl)benzamide

Instrument : GCMSD  
Sample Name: GNB-H  
Misc Info :  
Vial Number: 1

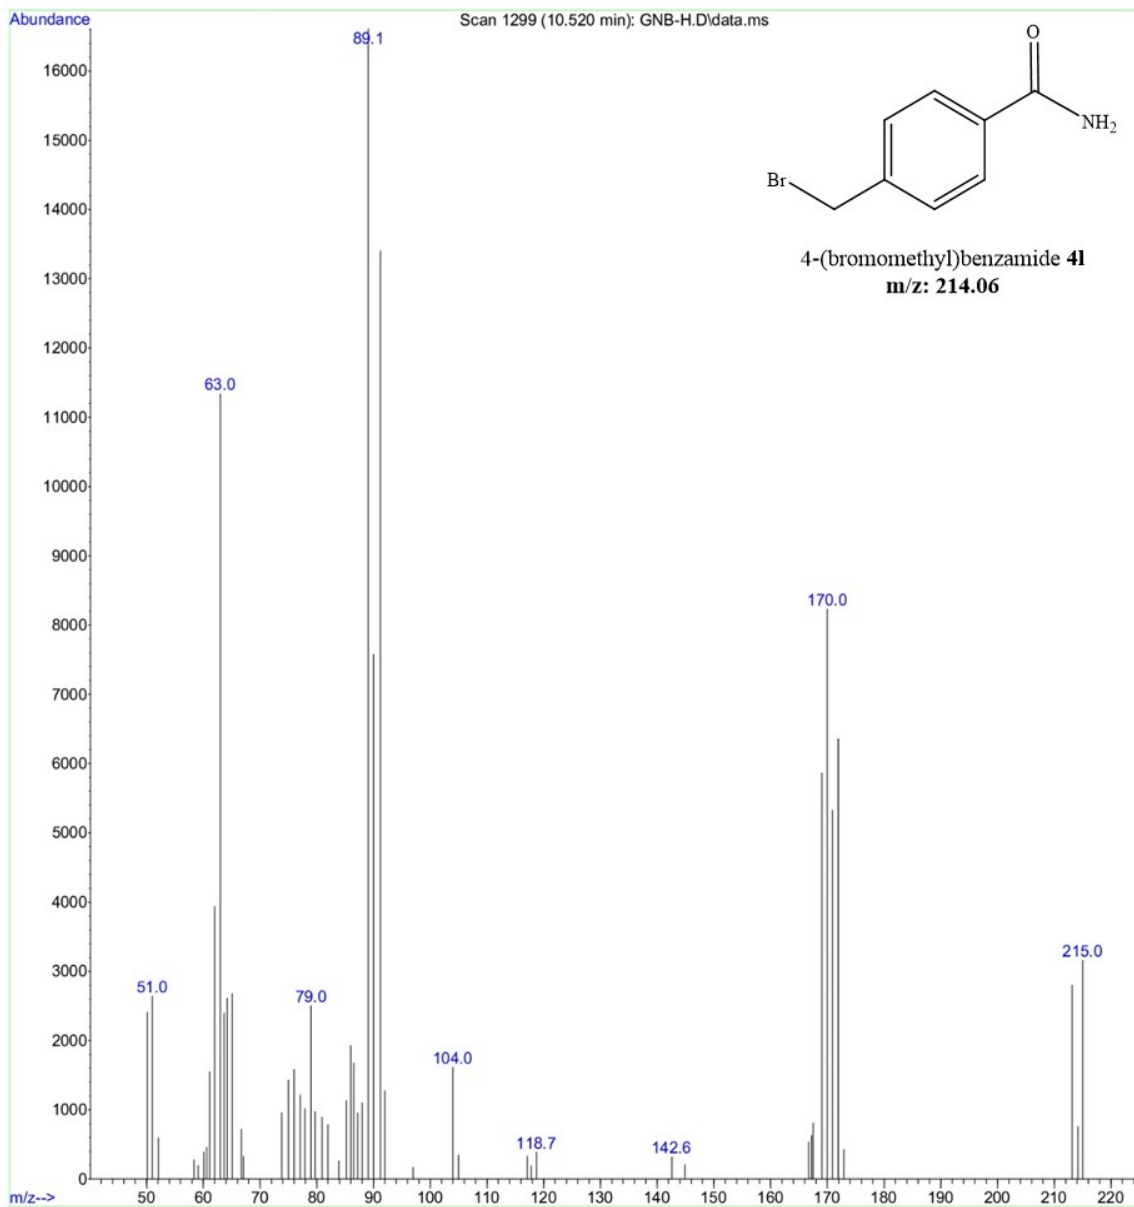



## 4-(cyanomethyl)benzamide

Instrument : GCMSD  
Sample Name: GNB-D  
Misc Info :  
Vial Number: 1

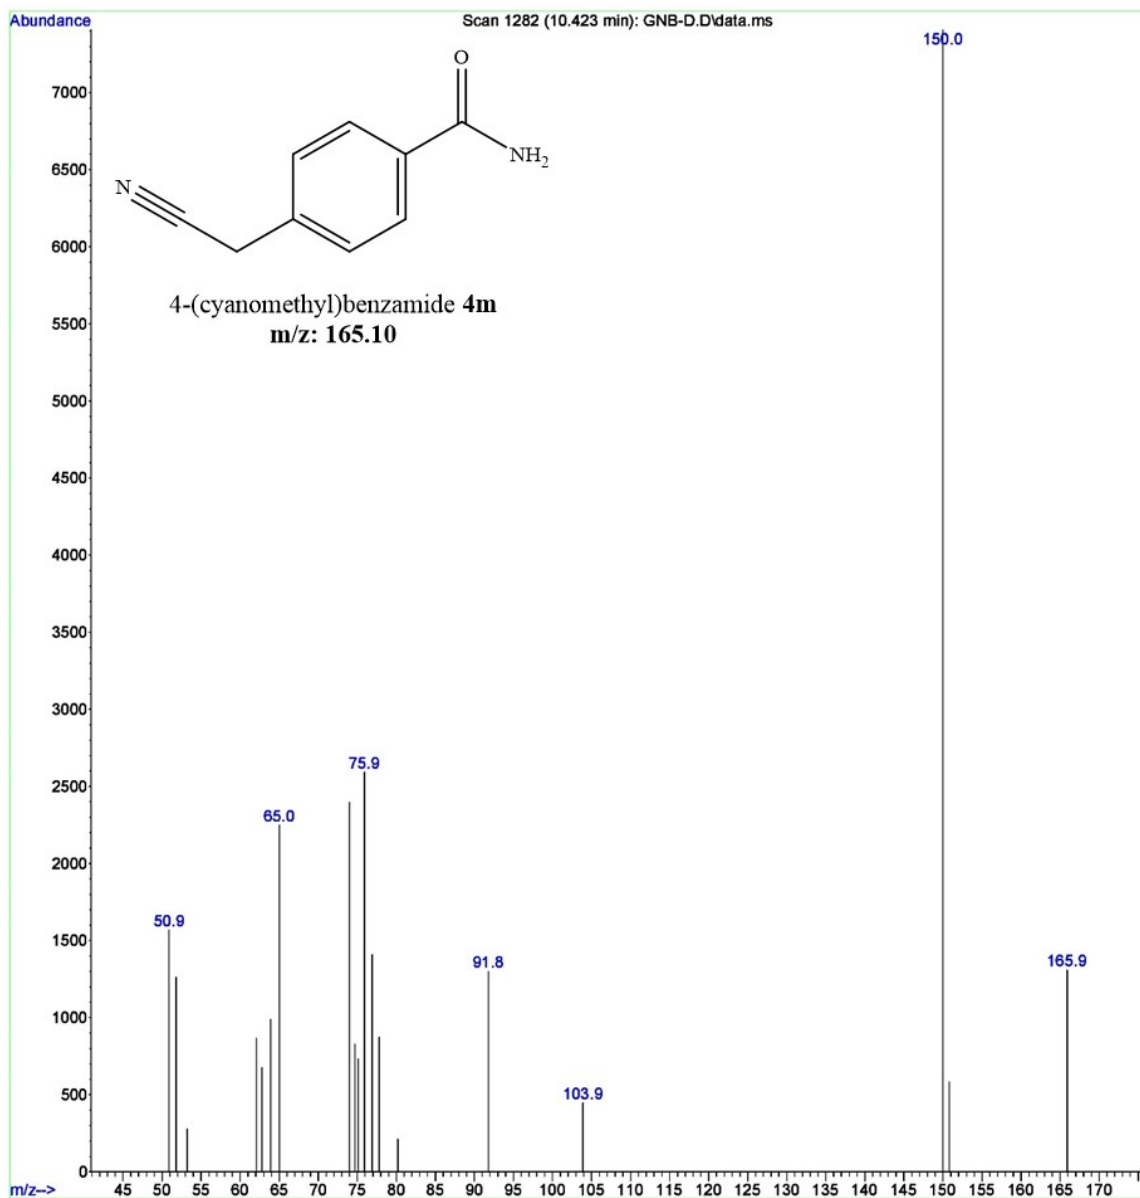

## Notes and references

- 1 Y. M. Jayawardena H. S. N., Liyanage Sajani H., Rathnayake K., Patel U., *Anal. Chem.*, 2021, **93**, 1889–1911.
- 2 A. Müller, T. Heinrich, S. Tougaard, W. S. M. Werner, M. Hronek, V. Kunz, J. Radnik, J. M. Stockmann, V. D. Hodoroaba, S. Benemann, N. Nirmalananthan-Budau, D. Geißler, K. Sparnacci and W. E. S. Unger, *J. Phys. Chem. C*, 2019, **123**, 29765–29775.
